# Supplementary material
Source: PubMed Central journal article supplement (PMC3740841)
Supplement: 1302233110_sapp.pdf [file 1302233110_sapp.pdf]

# Supporting Texts for "On Statistical Significance of Combinatorial Regulations" by Terada, A., Okada-Hatakeyama, M., Tsuda, K., Sese, J.

## Contents

### Supporting Text 1

|                             |   |
|-----------------------------|---|
| Mann-Whitney $U$ Test ..... | 1 |
|-----------------------------|---|

### Supporting Text 2

|                                                                     |    |
|---------------------------------------------------------------------|----|
| Comparison of LAMP with Bonferroni correction with four thresholds  |    |
| A. Statistics of the number of significant combinations .....       | 2  |
| B. The number of samples that contain significant combinations..... | 5  |
| C. The number of significant combinations .....                     | 10 |

### Supporting Text 3

|                                                      |    |
|------------------------------------------------------|----|
| Details of the TFs that bind to the motifs in Fig. 4 |    |
| A. The eight-motif combination .....                 | 15 |
| B. The seven-motif combination .....                 | 17 |
| C. The five-motif combination .....                  | 18 |

### Supporting Text 4

|                                             |    |
|---------------------------------------------|----|
| Monotonicity of the minimum $p$ -value..... | 19 |
|---------------------------------------------|----|

### Supporting Text 5

|                                         |    |
|-----------------------------------------|----|
| Frequent itemset mining algorithm ..... | 21 |
|-----------------------------------------|----|

|                           |    |
|---------------------------|----|
| Supporting Figure S1..... | 22 |
|---------------------------|----|

|                           |    |
|---------------------------|----|
| Supporting Figure S2..... | 23 |
|---------------------------|----|

|                          |    |
|--------------------------|----|
| Supporting Table S1..... | 24 |
|--------------------------|----|

## Supporting Text 1: Mann-Whitney $U$ Test

### Decrease of the minimum $p$ -value with respect to the number of genes in the Mann-Whitney $U$ Test

In this paper, we used Fisher's exact test as the statistical test. LAMP can be applicable to any statistical test as long as it satisfies the following two properties: the existence of a non-zero minimum  $p$ -value and decrease of the minimum value to the number of target genes. Here, we prove that the Mann-Whitney  $U$  test satisfies these properties to show that it can be used in LAMP.

Suppose that we have  $N$  genes and that we know their expression ranks under a specific condition. Given a binding motif combination, the set of genes whose regulatory regions contain all the motifs is defined as  $J$ .  $N$  genes are classified into  $x = |J|$  targeted and  $N - x$  untargeted genes. Mann-Whitney  $U$  is defined as the probability that the ranks achieves more biased than  $J$ .

The  $p$ -value is achieved at the smallest value when expression levels of genes in  $J$  are larger than the others, or they are smaller than the others. The probability to appear the case is described as

$$1 / \binom{N}{x}.$$

This is the minimum  $p$ -value of Mann-Whitney  $U$ .

This value decreases with increase of  $x$  for  $1 \leq x \leq N/2$ , and takes the minimum value when  $x = \lfloor N/2 \rfloor$ , which is non-zero value. Therefore, Mann-Whitney  $U$  can be used in LAMP.

## Supporting Text 2: Comparison of LAMP with Bonferroni correction with four thresholds

Summary of the numbers of significant combinations detected by LAMP and Bonferroni correction with four different thresholds

We compared LAMP and Bonferroni correction on one yeast and two human datasets with four thresholds that is used to divide the gene expressions in up-regulated and unregulated. Tables in Section A show the summary of the results. Figures in Section B show the number of samples in which at least one significant combination was found. Figures in Section C show the number of significant combinations. The combinations found by the combinations are in Table S1.

### A. Statistics of the number of significant combinations

The rows are:

- # of detected samples: The number of samples in which at least one motif combination is significant over all conditions (173 for yeast, 27 for EGF and 28 for HRG).
- # of significant combinations: The sum of the numbers of statistically significant motif combinations over all conditions.
- Maximum arity: The largest arity over all conditions.
- Avg. # of up-regulate genes: The average number of up-regulated genes over all conditions.
- Average, minimum and maximum of  $m'$ : The average, minimum and maximum value of  $m'$  over all conditions.

A. Yeast (The details are in Table S1A)

| Threshold (log2 ratio)        |                  | 0.5    | 1      | 1.5    | 2      |
|-------------------------------|------------------|--------|--------|--------|--------|
| Avg. # of up-regulated genes  |                  | 990.86 | 363.62 | 171.36 | 95.29  |
| # of detected samples         | LAMP             | 157    | 135    | 113    | 95     |
|                               | Bonferroni (<=2) | 134    | 111    | 95     | 78     |
|                               | Bonferroni (<=3) | 103    | 95     | 71     | 57     |
| # of significant combinations | LAMP             | 513    | 449    | 326    | 235    |
|                               | Bonferroni (<=2) | 308    | 264    | 192    | 137    |
|                               | Bonferroni (<=3) | 187    | 176    | 108    | 82     |
| Stats of LAMP                 | Maximum arity    | 3      | 3      | 4      | 3      |
|                               | Avg. of $m'$     | 243.30 | 366.43 | 446.30 | 498.34 |
|                               | Min. of $m'$     | 132    | 183    | 233    | 290    |
|                               | Max of $m'$      | 554    | 556    | 702    | 703    |

B. EGF induced sample (The details are in Table S1B)

| Threshold (log2 ratio)        |                  | 0.5       | 1         | 1.5       | 2         |
|-------------------------------|------------------|-----------|-----------|-----------|-----------|
| Avg. # of up-regulated genes  |                  | 2359.81   | 1226.67   | 777.04    | 491.26    |
| # of detected samples         | LAMP             | 17        | 20        | 16        | 10        |
|                               | Bonferroni (<=2) | 21        | 23        | 22        | 16        |
|                               | Bonferroni (<=3) | 8         | 14        | 13        | 6         |
| # of significant combinations | LAMP             | 46        | 43        | 23        | 24        |
|                               | Bonferroni (<=2) | 78        | 70        | 41        | 38        |
|                               | Bonferroni (<=3) | 20        | 19        | 14        | 8         |
| Stats of LAMP                 | Maximum arity    | 5         | 8         | 7         | 8         |
|                               | Avg. of $m'$     | 1,742,870 | 3,669,596 | 5,180,881 | 7,169,767 |
|                               | Min. of $m'$     | 1,459,869 | 2,700,718 | 3,750,336 | 5,238,103 |
|                               | Max of $m'$      | 2,700,718 | 3,750,336 | 5,238,103 | 7,247,034 |

C. HRG induced sample (The details are in Table S1C)

| Threshold (log2 ratio)        |                  | 0.5       | 1         | 1.5       | 2         |
|-------------------------------|------------------|-----------|-----------|-----------|-----------|
| Avg. # of up-regulated genes  |                  | 4189.54   | 2337.36   | 1277.00   | 758.68    |
| # of detected samples         | LAMP             | 18        | 12        | 10        | 7         |
|                               | Bonferroni (<=2) | 25        | 21        | 12        | 12        |
|                               | Bonferroni (<=3) | 5         | 6         | 4         | 1         |
| # of significant combinations | LAMP             | 26        | 23        | 16        | 11        |
|                               | Bonferroni (<=2) | 40        | 43        | 26        | 19        |
|                               | Bonferroni (<=3) | 5         | 7         | 7         | 1         |
| Stats of LAMP                 | Maximum arity    | 6         | 5         | 5         | 6         |
|                               | Avg. of $m'$     | 579,531   | 1,790,220 | 3,800,657 | 5,561,464 |
|                               | Min. of $m'$     | 359,149   | 1,174,198 | 2,874,627 | 3,982,295 |
|                               | Max of $m'$      | 1,174,108 | 2,874,627 | 5,542,428 | 7,635,557 |

**B. Comparisons of the numbers of samples in which at least one motif combination is significant between LAMP and Bonferroni correction.**

**B-1. Yeast**

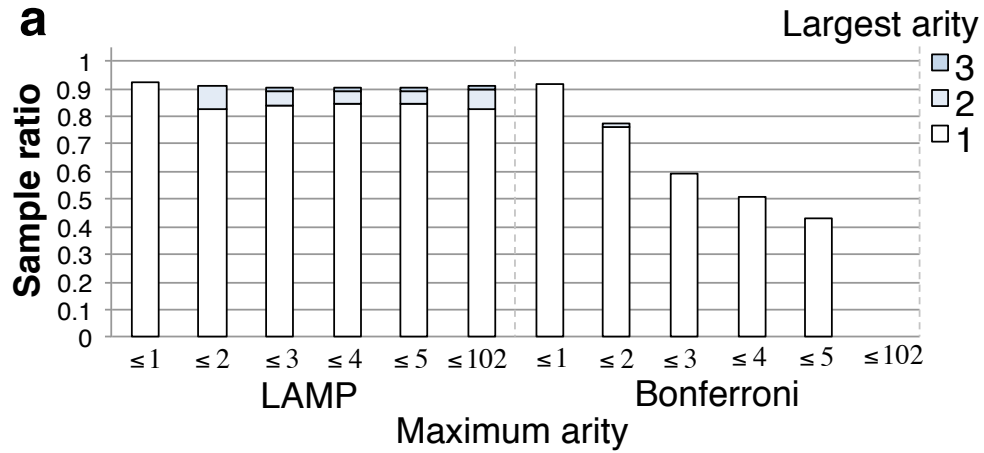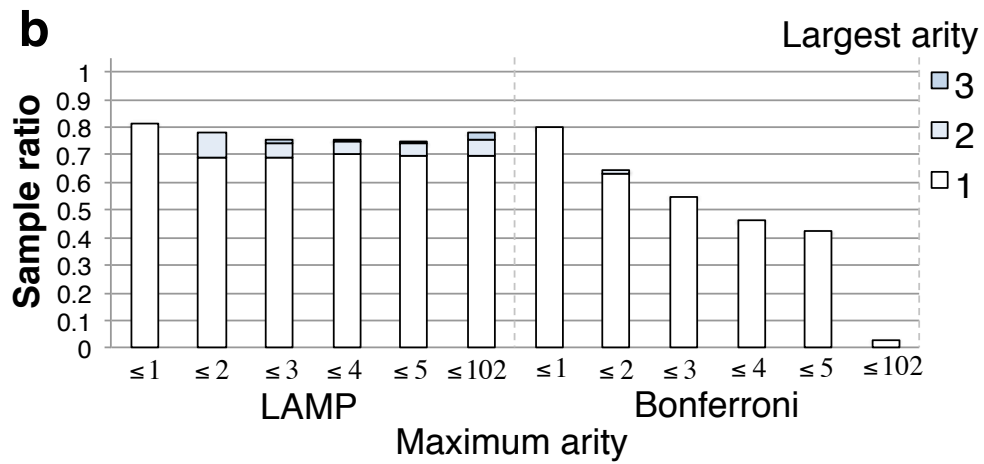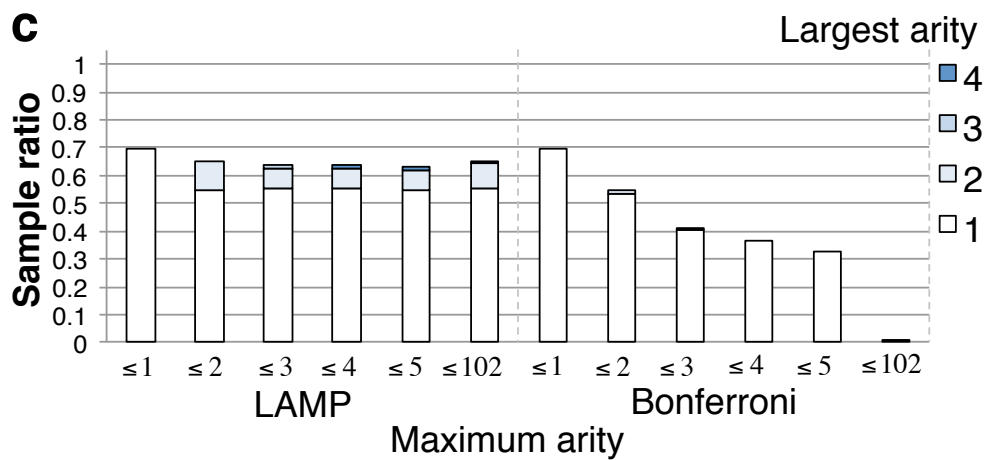

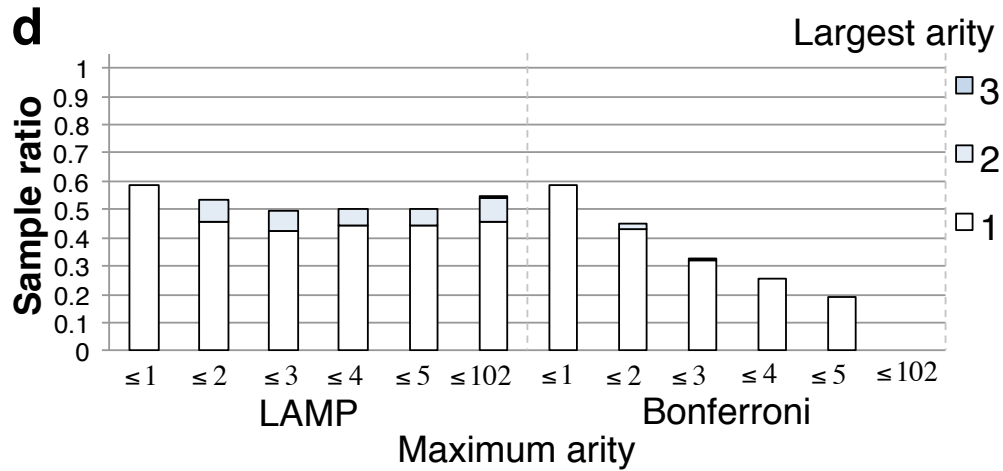

Sample ratios in which at least one motif combination is significant over 173 yeast stress environments. We varied the arity limit and computed the number of samples in which at least one sample was deemed significant for the specified arity limit. The number of motifs we used was 102. The significant level  $\alpha$  was set to 0.05. We also used the Bonferroni correction to compute the motif combinations under three different expression thresholds, which correspond to the data shown in Supporting Table S1. For any threshold, the LAMP found at least one motif combination from at least half the samples even when the arity limit was removed. However, the number of samples detected using the Bonferroni correction decreased with the increasing arity limit, and the Bonferroni correction found significant combinations from only a few samples when the arity limit was removed. The colors indicate the largest arity. The LAMP discovered at most four-motif combinations, whereas the Bonferroni correction found at most two-motif combinations.

(a) Expression threshold = 0.5. (b) Expression threshold = 1.0. (c) Expression threshold = 1.5. (d) Expression threshold = 2.0.

**B-2. Human MCF-7**

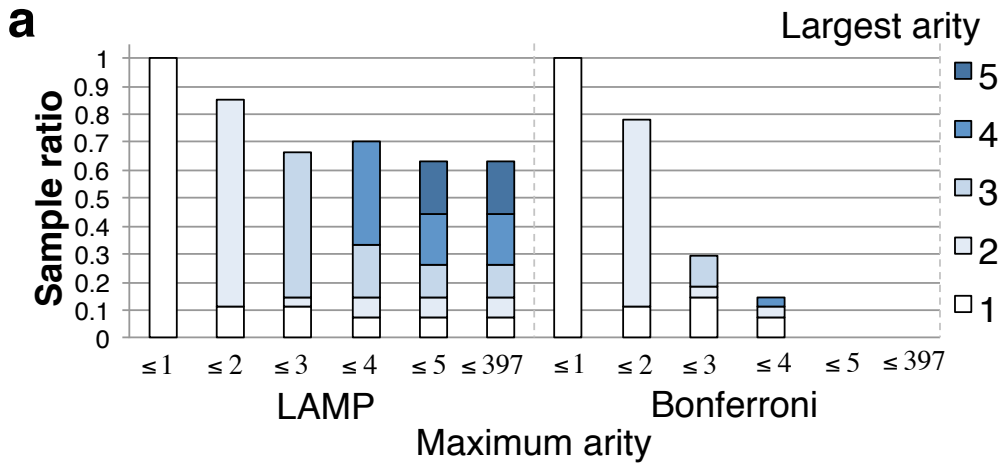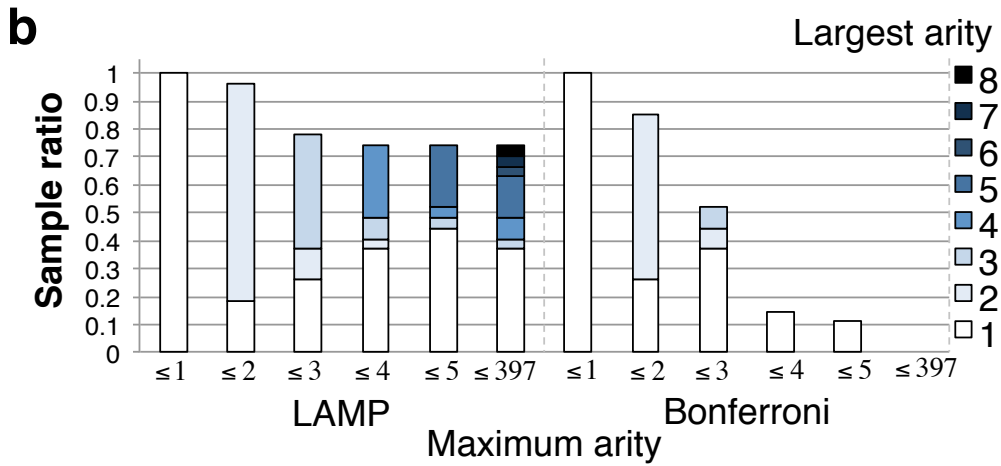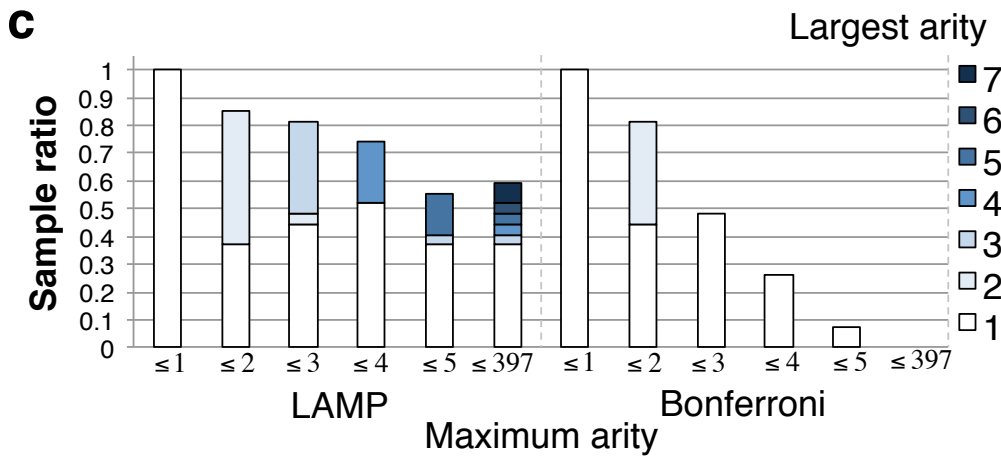



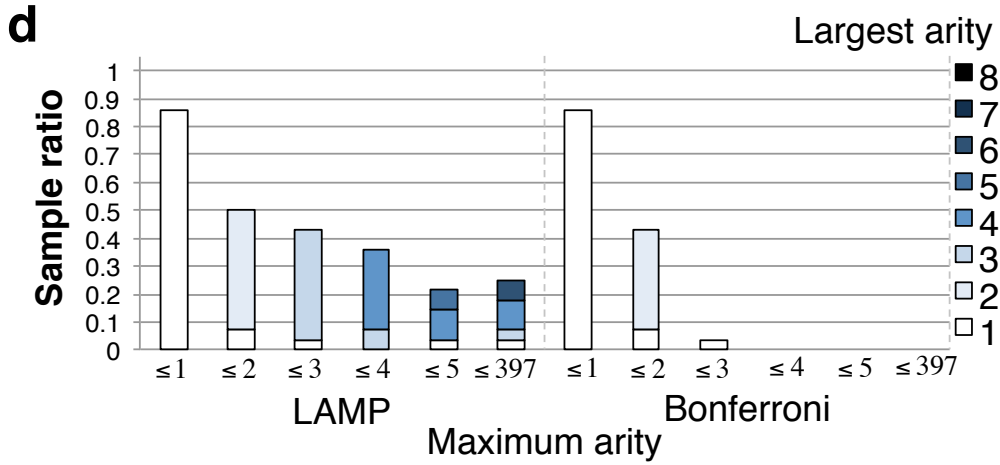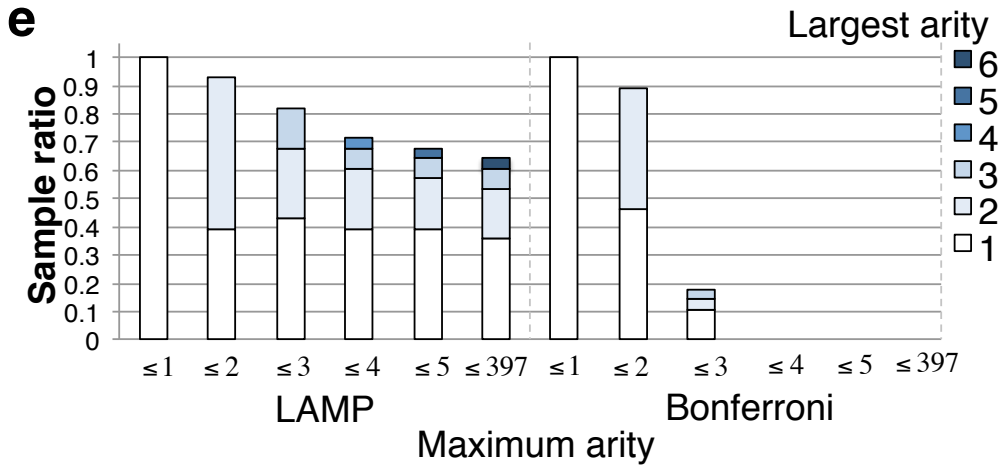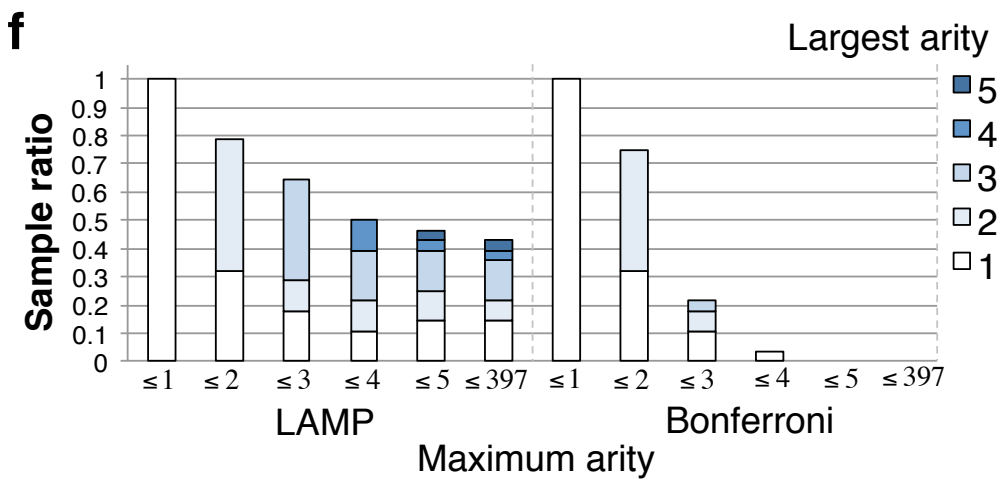

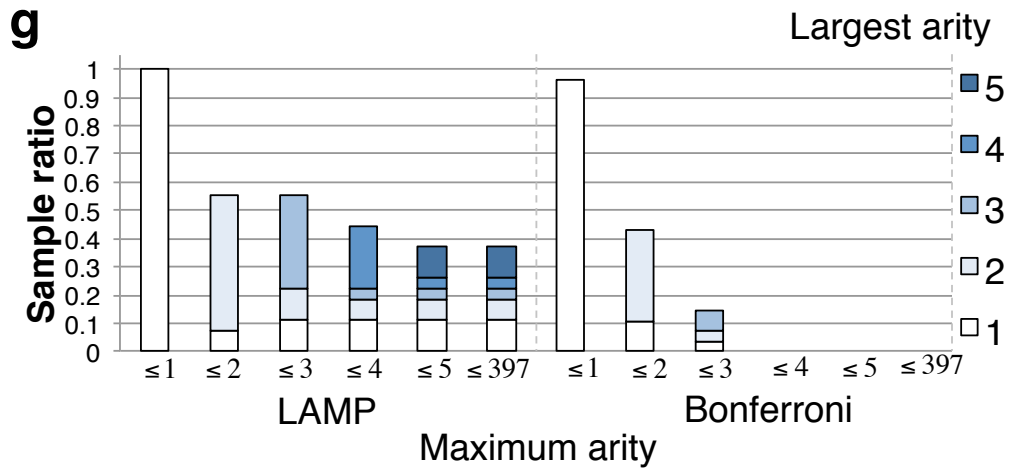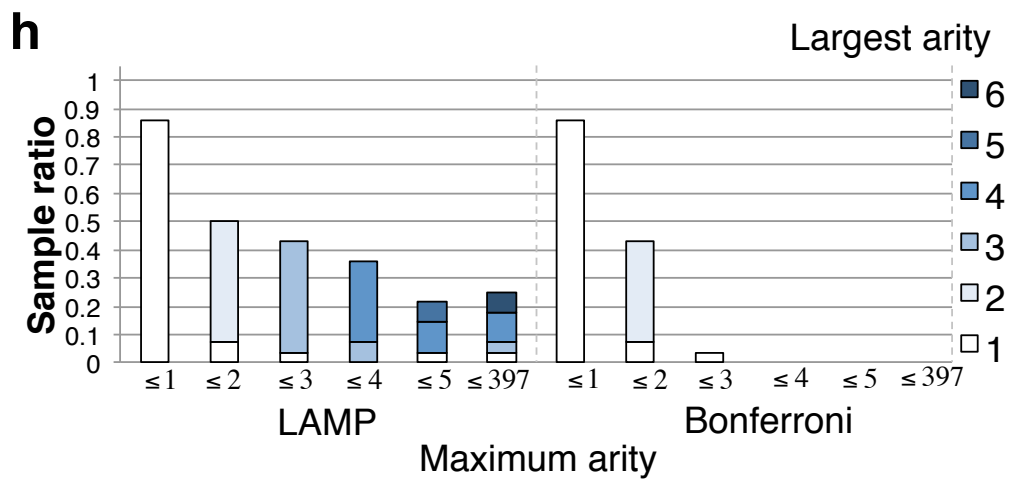

Sample ratios in which at least one motif combination was deemed significant in 27 HRG<sup>-</sup> and 28 HRG<sup>-</sup>induced MCF-7 cell samples. We varied the arity limit and computed the number of samples in which at least one sample deemed significant for the specified arity limit. The number of motifs was 397. The significance level  $\alpha$  was set to 0.05. We computed the combinations under three different thresholds for performing Fisher's exact test. The colors indicate the largest arity.

- (a) EGF, expression threshold = 0.5. (b) EGF, expression threshold = 1.0.
- (c) EGF, expression threshold = 1.5. (d) EGF, expression threshold = 2.0.
- (e) HRG, expression threshold = 0.5. (f) HRG, expression threshold = 1.0.
- (g) HRG, expression threshold = 1.5. (h) HRG, expression threshold = 2.0.

**C. Comparison of the numbers of significant combinations between LAMP and Bonferroni correction.**

**C-1. Yeast**

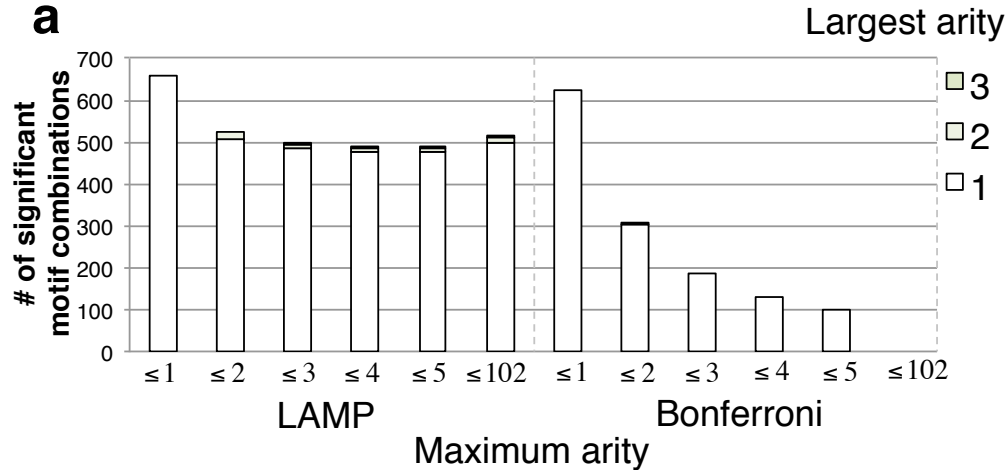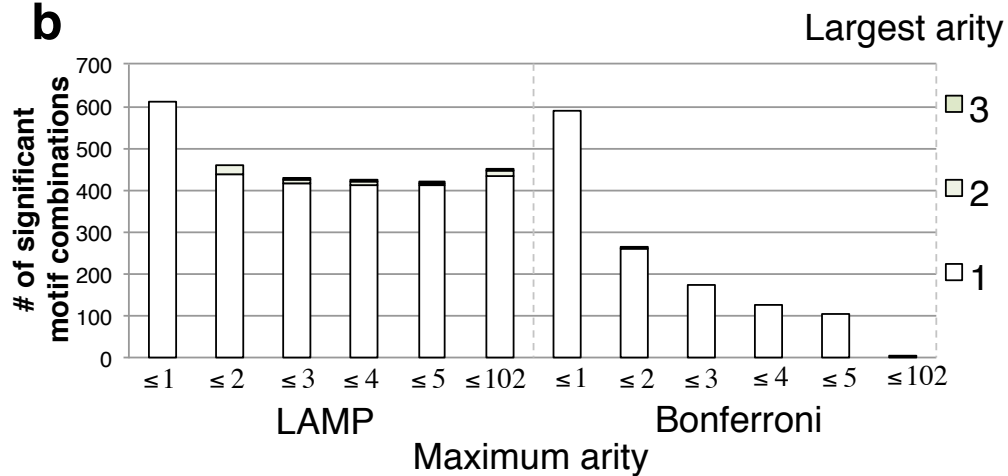

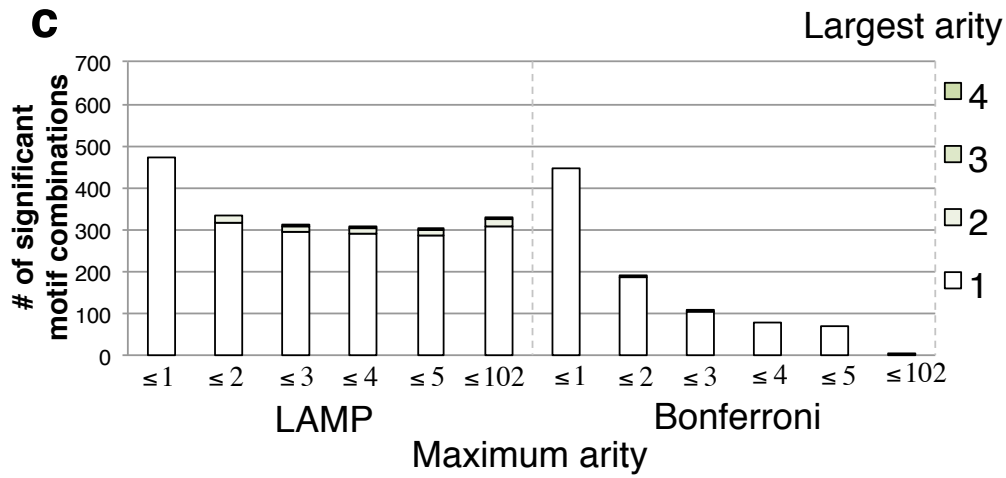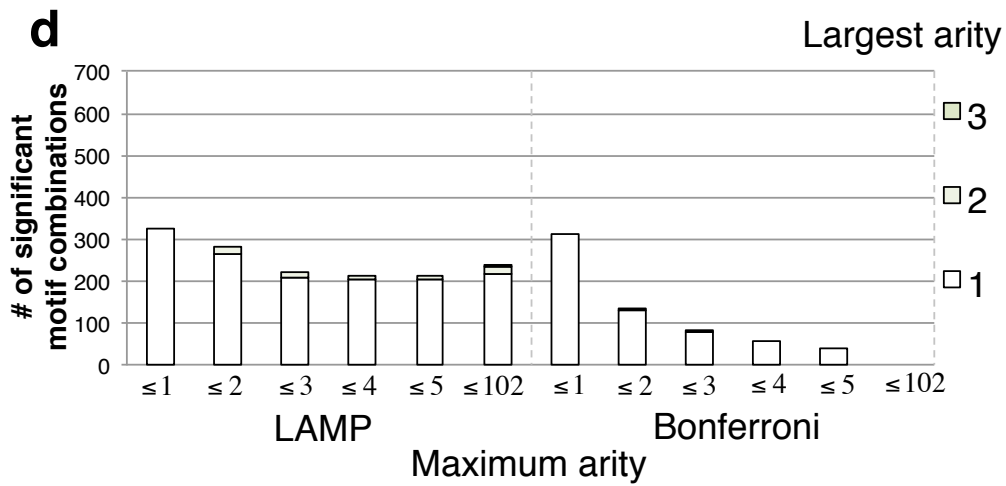

The number of statistically significant motif combinations in the 173 yeast stress environments. Each bar indicates the number of statistically significant motif combinations for a specific arity limit. Within the bar, the colors indicate the largest arity. We computed these combinations under three different expression thresholds for Fisher's exact test. The LAMP found more than 200 motif combinations even when the arity limit was removed, whereas the Bonferroni correction found 9 combinations under any threshold.

(a) Expression threshold = 0.5. (b) Expression threshold = 1.0. (c) Expression threshold = 1.5. (d) Expression threshold = 2.0.

C-2. Human MCF-7

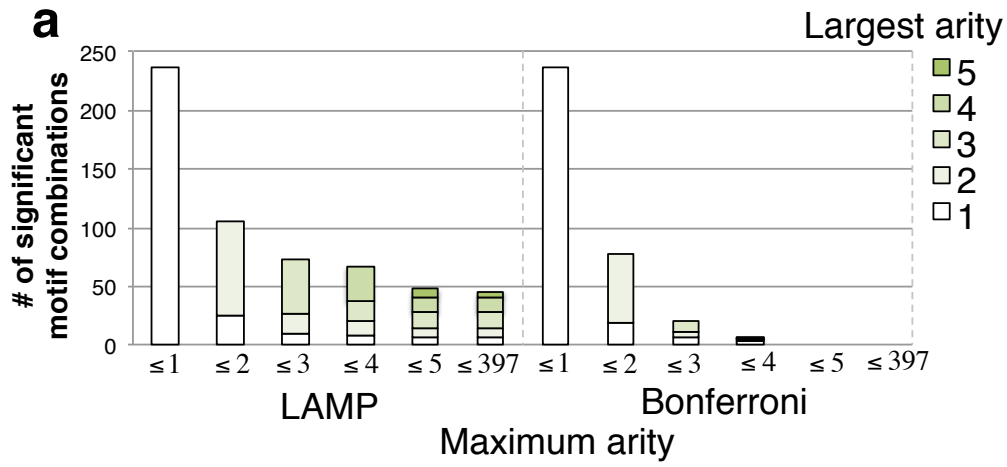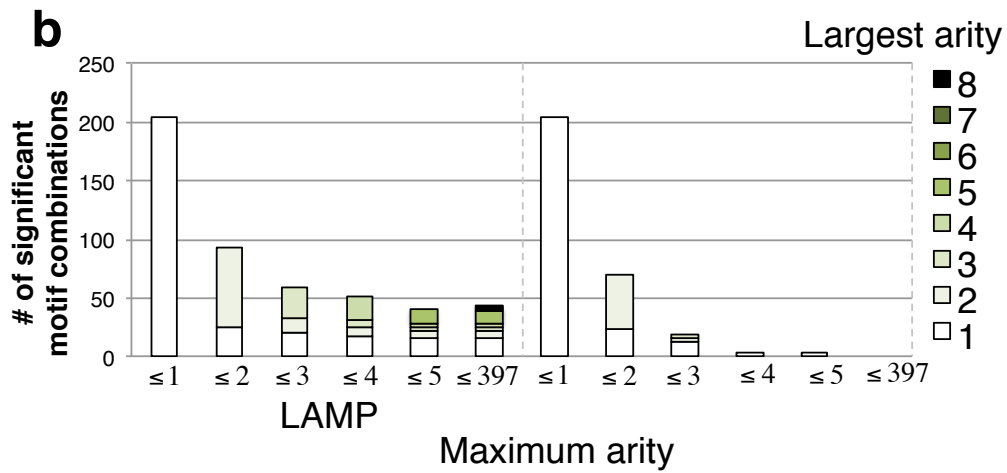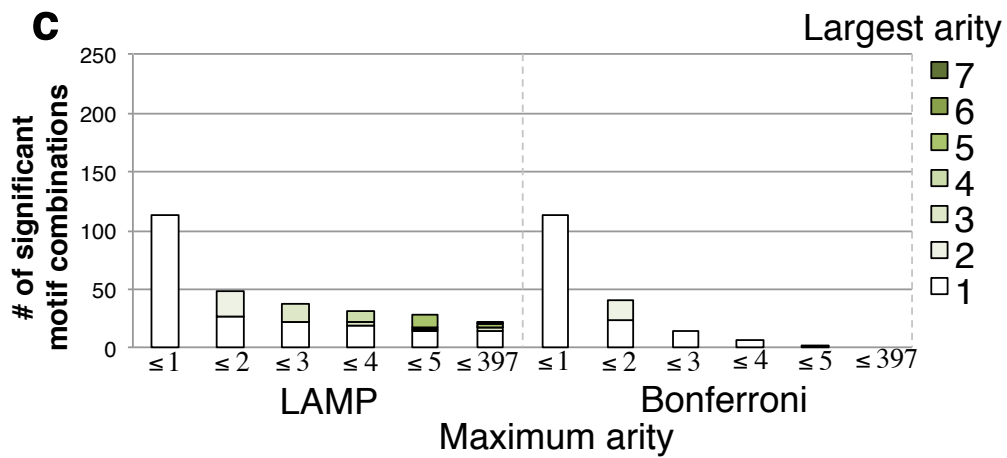

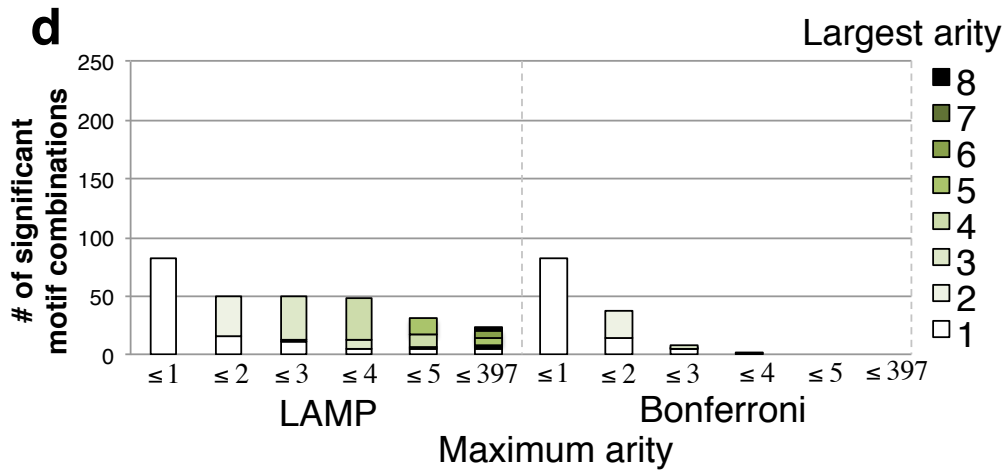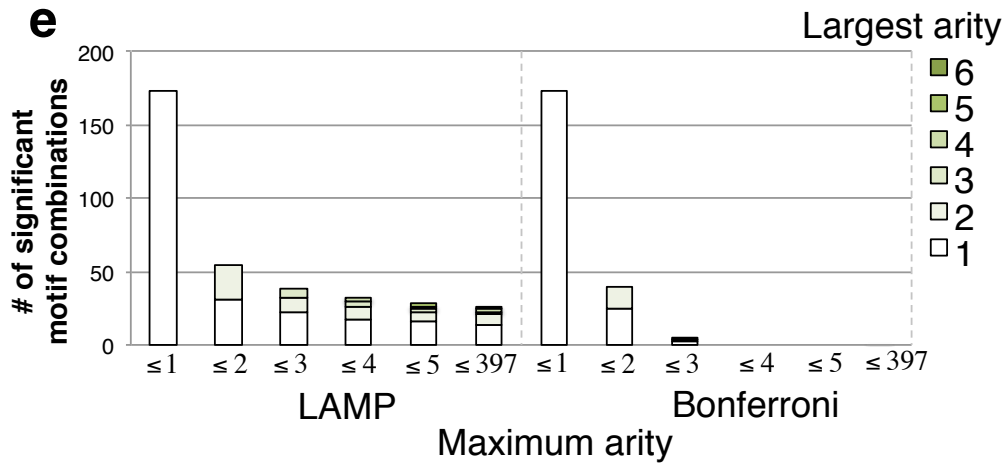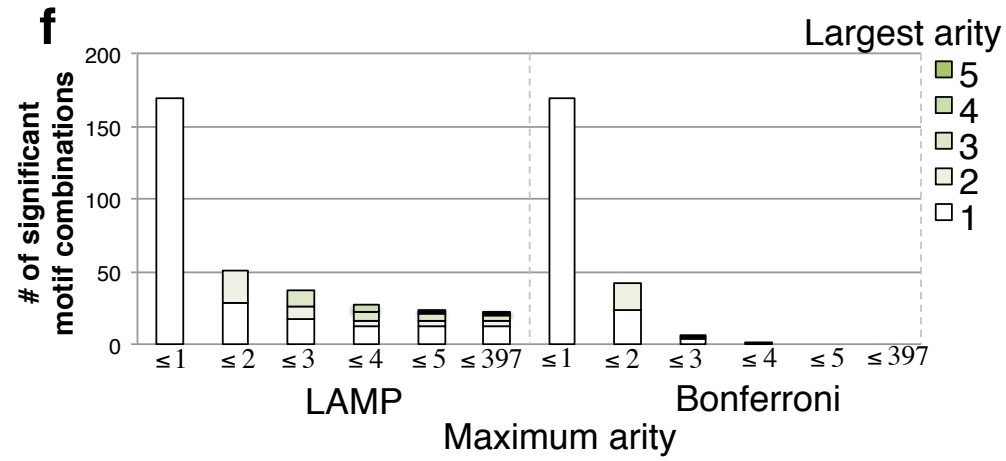

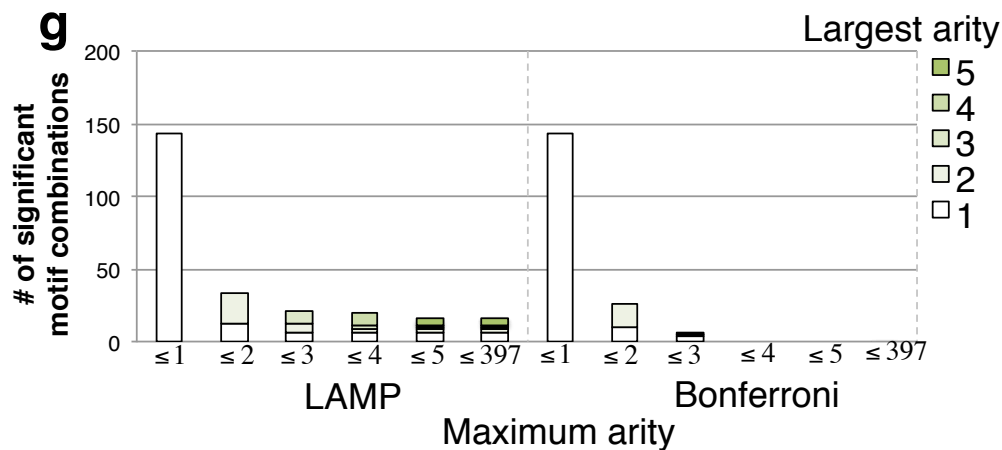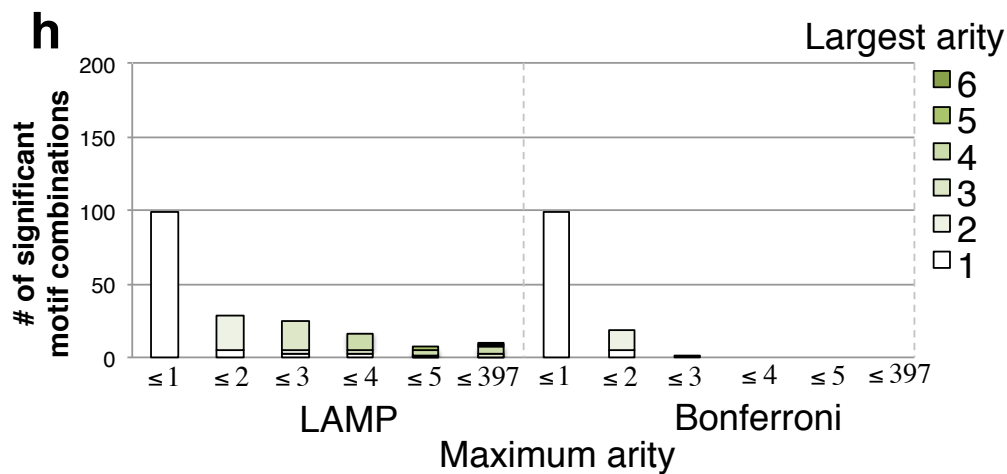

The number of statistically significant motif combinations in 27 EGF and 28 HRG induced MCF-7 cell samples. Each bar indicates the number of statistically significant motif combinations for the specified arity limit. Within the bar, the colors indicate the largest arity. We computed the combinations under three different thresholds for performing Fisher's exact test. Whereas the Bonferroni correction detected only a few combinations when up to 5-motif combinations were considered, the LAMP found more than 16 combinations, including one 8-motif combination.

- (a) EGF, expression threshold = 0.5. (b) EGF, expression threshold = 1.0.
- (c) EGF, expression threshold = 1.5. (d) EGF, expression threshold = 2.0.
- (e) HRG, expression threshold = 0.5. (f) HRG, expression threshold = 1.0.
- (g) HRG, expression threshold = 1.5. (h) HRG, expression threshold = 2.0.

## Supporting Text 3: Details of the TFs that bind to the motifs in Fig. 4

TFs that bind to the motifs in Fig. 4 and their expression levels.

### A. The eight-motif combination

#### A-1. The list of TFs that can bind to the motif

| Motif   | TFs that bind to the motif                           |
|---------|------------------------------------------------------|
| CTTTAAR | -                                                    |
| C/EBP   | <i>C/EBP, CEBPB</i>                                  |
| EVI1    | <i>EVI1</i>                                          |
| FOXO4   | <i>FOXA1, FOXA2, FOXO1, FOXO4, HMGA1</i>             |
| GR      | <i>GR</i>                                            |
| LEF1    | <i>LEF1</i>                                          |
| NFAT    | <i>ELOF1, FOXK2, NFATC1, NFATC2, NFATC3, NFATC4</i>  |
| OCT1    | <i>GATA1, JUN, NFYA, NFYB, NFYC, OCT1, OCT2, SP1</i> |

#### A-2. The expression levels of TFs that bind to the motifs.

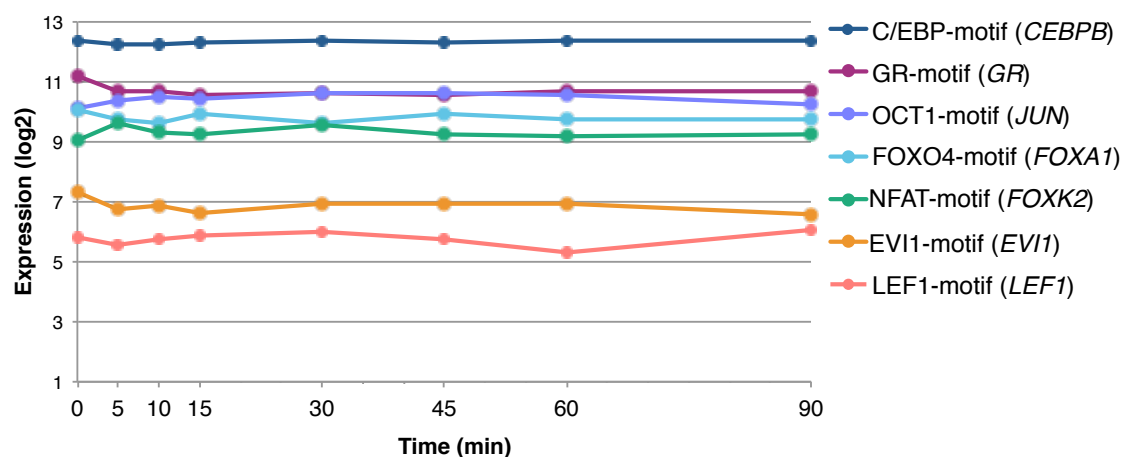



Expression levels of TFs that bind to the motifs in the eight-motif combination. Each line corresponds to one motif and shows the expression levels of a TF that can bind to the motif. When single motif is recognized by multiple TFs, we selected the TF whose expression level under control (0 min) among TFs that can bind to the motif is the highest one. The name on each line is the motif name, and the TF name is in parentheses. For example, since *CEBPB* can bind to the C/EBP-motif and the expression of *CEBPB* is higher than that of *C/EBP* at 0 min, the expression levels of *CEBPB* are described in the figure as a blue line. When the TF has multiple probes in Affimetrix chip, the probe that has the highest expression level at 0 min is used. The motif "CTTTAAR" is not shown because no TF bound to the motif is identified yet.

## B. The seven-motif combination

### B-1. The list of TFs that can bind to the motifs.

| Motif  | TFs that bind to the motif                          |
|--------|-----------------------------------------------------|
| EVI1   | <i>EVI1</i>                                         |
| FOXO4  | <i>FOXA1, FOXA2, FOXO1, FOXO4, HMGA1</i>            |
| LEF1   | <i>LEF1</i>                                         |
| MEF2   | <i>MEF2, MEF2D</i>                                  |
| NFAT   | <i>ELOF1, FOXK2, NFATC1, NFATC2, NFATC3, NFATC4</i> |
| SREBP1 | <i>SREBP1</i>                                       |
| TATA   | <i>GTF2B, HINFP, RXRA, TBP, THRB, TMF1</i>          |

### B-2. The expression levels of the TFs that bind to the motifs.

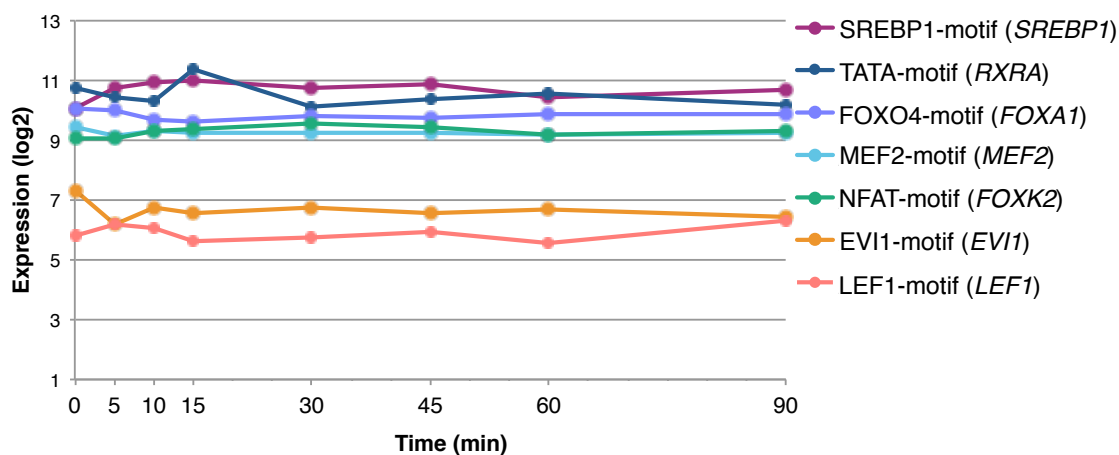

Expression levels of the TFs that bind to the motifs in seven-motif combination. Each line indicates the expression levels of the TF that binds to the motif. If multiple TFs can be bound to the motif, the expression levels of the TF whose expression level at control sample is the highest are shown. The name of the TF is in parentheses.

### C. The five-motif combination

#### C-1. The list of TFs that can bind to the motifs

| Motif  | TFs that bind to the motif                                       |
|--------|------------------------------------------------------------------|
| AACTTT | -                                                                |
| FOXO4  | <i>FOXA1, FOXA2, FOXO1, FOXO4, HMGA1</i>                         |
| NFKB   | <i>NFKB1, NFKB2, REL, RELA</i>                                   |
| OCT    | <i>CREB1, GATA1, JUN, NFYA, NFYB, NFYC, POU5F1, POU5F1B, SP1</i> |
| NFAT   | <i>ELOF1, FOXK2, NFATC1, NFATC2, NFATC3, NFATC4</i>              |

#### C-2. The expression levels of the TFs that bind to the motifs.

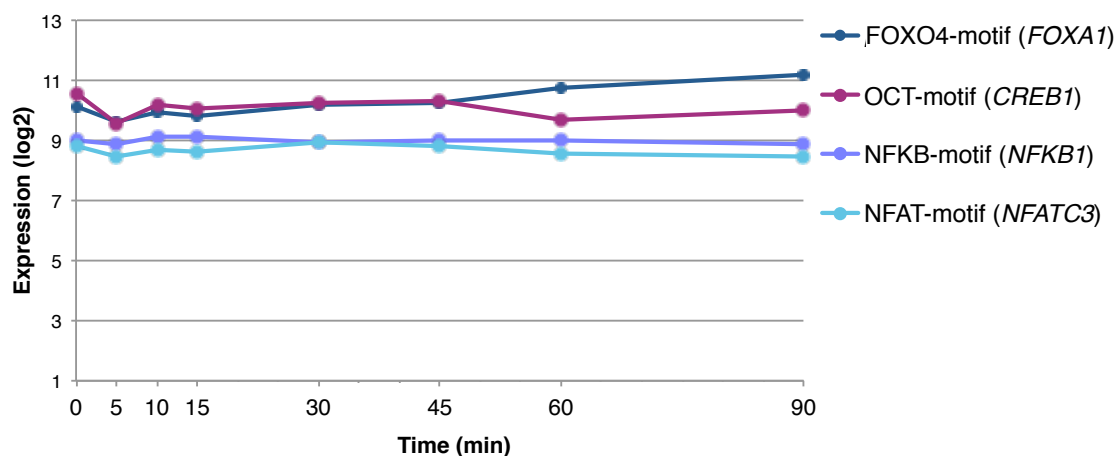

Expression levels of the TFs that bind to the motifs in the five-motif combination. Each line indicates the expression levels of the TF that binds to the motif. If multiple TFs can be bound to the motif, the expression levels of the TF whose expression level at control sample is the highest are shown. The name of the TF is in parentheses. The motif "AACTTT" is not shown because no TF bound to the motif is identified yet.

### Supporting Text 4: Monotonicity of the minimum $p$ -value

Our algorithm takes advantage of the fact that the minimum  $p$ -value decreases to its occurrence frequency. In this section, we show the detail of the minimum  $p$ -value.

Suppose that we have  $N$  genes. Only one expression level is available for each of the  $N$  genes. Given a motif combination, the genes are partitioned in two ways. In one way, the genes are classified into  $x$  targeted and  $N - x$  untargeted genes, depending on whether they are targeted by all of the members of the motif combination or not. In the other way, they are classified into  $n_u$  up-regulated genes and  $N - n_u$  unregulated genes. Let  $n$  be the number of genes that are targeted and upregulated.

Using One-sided Fisher's exact test, the  $p$ -value of the motif combination is computed as

$$p = \sum_{n_x=n}^B P(n_x), P(n_x) = \binom{n_u}{n_x} \binom{N - n_u}{x - n_x} / \binom{N}{x},$$

where  $B = \min\{n_u, x\}$ . If we regard that  $n$  is a variable, the minimum value of  $p$  is achieved at  $n = B$ , and described as

$$f'(x) = \binom{n_u}{x} / \binom{N}{x} \text{ (for } x \leq n_u), \binom{N - n_u}{x - n_u} / \binom{N}{x} \text{ (for } x > n_u).$$

In the most case,  $x \leq n_u$ , and the following Property 1 confirms the monotonicity of the minimum  $p$ -value, which is required to use the function in LAMP. On the other hand, when  $x > n_u$ , the property is not satisfied. Therefore, we define a function which is smaller than the minimum  $p$ -value to satisfy the monotonicity.

**Property 1.** For  $1 \leq x < N/2$  and  $x \leq n_u$ ,  $f'(x) \leq f'(x - 1)$  holds.

*Proof.* Between  $x$  and  $x - 1$ , the following equation holds:

$$\begin{aligned} \binom{n_u}{x} &= \frac{n_u(n_u - 1) \cdots (n_u - x + 2)(n_u - x + 1)}{x!} \\ &= \frac{n_u - x + 1}{x} \frac{n_u(n_u - 1) \cdots (n_u - x + 2)}{(x - 1)!} \\ &= \frac{n_u - x + 1}{x} \binom{n_u}{x - 1}. \end{aligned}$$

Similarly,

$$\binom{N}{x} = \frac{N - x + 1}{x} \binom{N}{x - 1}.$$

Based on these equations,

$$\begin{aligned}
f'(x) &= \binom{n_u}{x} / \binom{N}{x} \\
&= \left\{ \frac{n_u - x + 1}{x} \binom{n_u}{x-1} \right\} / \left\{ \frac{N - x + 1}{x} \binom{N}{x-1} \right\} \\
&= \left\{ \frac{n_u - x + 1}{x} / \frac{N - x + 1}{x} \right\} \left\{ \binom{n_u}{x-1} / \binom{N}{x-1} \right\} \\
&= \frac{n_u - x + 1}{N - x + 1} f'(x-1)
\end{aligned}$$

From  $n_u \leq N$ ,  $(n_u - x + 1)/(N - x + 1) \leq 1$ . Hence,  $f'(x) \leq f'(x-1)$ .  $\square$

For  $x > n_u$ , the similar calculation of Property 1 shows that  $f'(x)$  increases to  $x$  monotonically. LAMP requires a monotonically decreasing function to  $x$ , and hence  $f'(x)$  cannot be used as the minimum  $p$ -value directly. Instead of the function, we use

$$f'(x) = 1 / \binom{N}{n_u}$$

as the minimum value since it is smaller than  $f'(x)$  and constant, which means that  $f'$  is a monotonically decreasing function.

By combining these two formulas, the minimum  $p$ -value  $f(x)$  that satisfies the monotonicity is defined as

$$f(x) = \binom{n_u}{x} / \binom{N}{x} \text{ (for } x \leq n_u), 1 / \binom{N}{n_u} \text{ (for } x > n_u).$$

## Supporting Text 5: Frequent itemset mining algorithm

### Overview of the frequent itemset mining algorithms

We here provide an overview of frequent itemset mining algorithms. The frequent itemset mining problem is to list all patterns that appear frequently in a data. One typical application of this problem is to find sets of items (itemsets) that customers are likely to purchase on a given trip to the store. The itemset that satisfies the condition is called a frequent itemset. In this study we used the algorithm to list up sets of motifs that share more than  $\lambda$  target genes.

We here introduce how the frequent itemset mining algorithm efficiently lists up the frequent itemsets. For the listing, the following property is used. Given  $k$ -motif combination  $T$  that targets  $x$  genes. Let  $t$  be a motif which is not in  $T$  and let us generate  $T'$  by adding  $t$  to  $T$ . The number of target genes of  $T'$  is smaller or equal to that of  $T$ . From this property, if  $x$  becomes less than  $\lambda$ , the number of target genes of any  $T'$  is less than  $\lambda$ , and hence it guarantees that  $T'$  contains no motif combinations that target  $\lambda$  or more genes.

The frequent itemset mining algorithm generates the motif combinations from lower-arity combinations. It generates all single motifs first, and motifs that target  $\lambda$  or more genes are selected. Let  $\mathbf{L}_1$  be the set of the selected motifs. In LAMP, all motifs in the  $\mathbf{L}_1$  are testable because their bounds of the minimum  $p$ -value are less than the candidate  $p$ -value. Then, the algorithm generates 2-motif combinations by combining two motifs in  $\mathbf{L}_1$  and selects 2-motifs that target  $\lambda$  or more genes. Since the number of target genes of a 2-motif combination is smaller or equal to both single motifs in the 2-motif, we generate the 2-motif only from the motifs in  $\mathbf{L}_1$ . 2-motif combinations that target  $\lambda$  or more genes are stored in  $\mathbf{L}_2$ .

Let  $\mathbf{L}_k$  be the list of  $k$ -motif combinations that target  $\lambda$  or more genes. From the list,  $\mathbf{L}_{k+1}$  can be generated. The itemset mining algorithm repeats this process until  $\mathbf{L}_k$  contains no motif combinations. By combining all  $\mathbf{L}_k$ , all itemsets that target  $\lambda$  or more genes are listed without the generation of entire combinations.

Based on this idea, the first algorithm to efficiently list up the frequent itemsets called *Apriori* was introduced by Agrawal and Shrikant [31]. Han *et al.* [32] introduced more efficient algorithm under large memory environment to list up frequent itemsets, called FP-tree. It generates a tree of items in frequent itemsets, and then lists up the frequent items using the tree. Uno *et al.* [33] proposed a memory efficient algorithm, called LCM. We used the Uno's implementation to find frequent sets of motifs.

## Supporting Figures

Supporting Fig. S1.

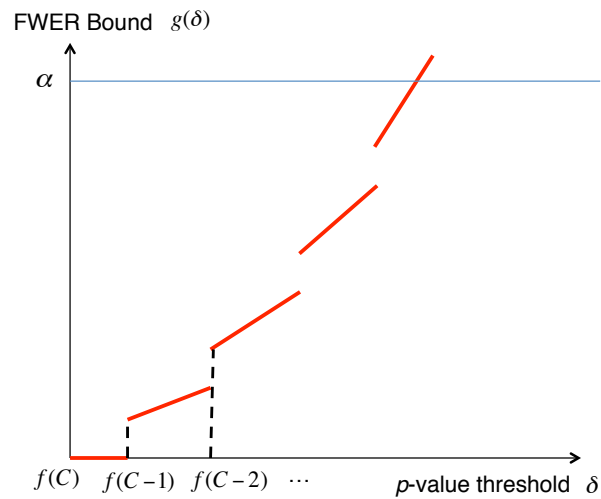

Illustration of the relationship between  $\delta$  and  $g(\delta)$ . The red lines form a piece-wise linear function. The gaps are located at  $f(\lambda)$ , where  $\lambda = C, C - 1, \dots, 1$ .  $\alpha$  is the significance level. The crossing point of the two lines indicates the optimal correction.

Supporting Fig. S2.

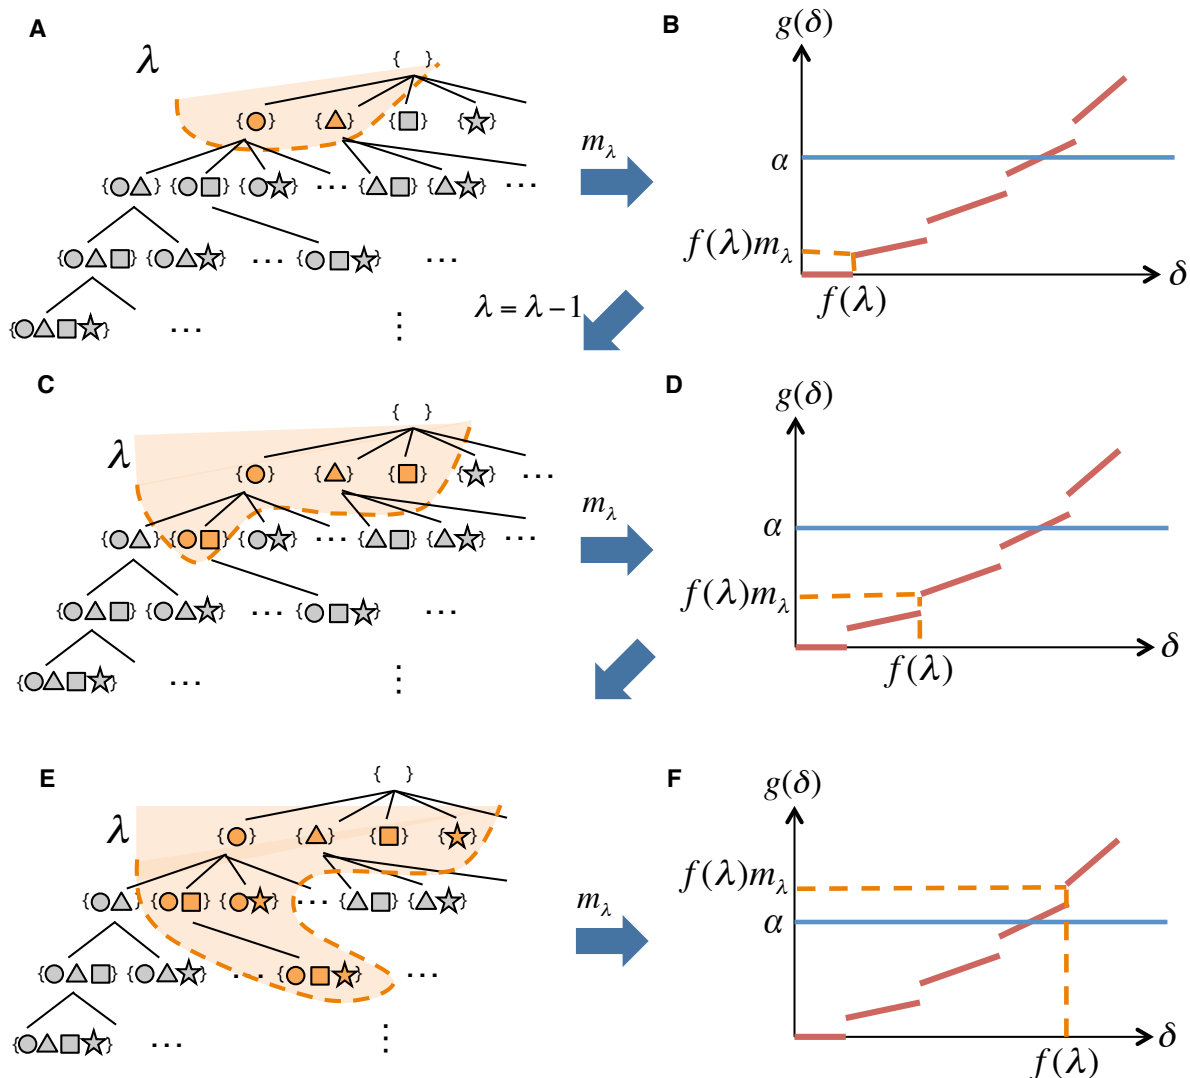

Illustration of the algorithm of the LAMP. (a) Starting from the largest  $\lambda$ , the frequent itemset mining algorithm listed up motif combinations that target  $\lambda$  or more genes. The number of the combinations is  $m_\lambda$ . (b) From  $m_\lambda$  and  $f(\lambda)$ , the FWER bound  $f(\lambda)m_\lambda$  can be calculated. Because the FWER bound is smaller than  $\alpha$  in this figure,  $m_\lambda$  is not sufficiently large to be a corrected significance level. (c) By decreasing  $\lambda$ ,  $m_\lambda$  becomes large. The motif combinations that target  $\lambda$  or more genes were listed up using a frequent itemset mining algorithm.  $m_\lambda$  is computed from the result. (d) If  $f(\lambda)m_\lambda$  is still smaller than  $\alpha$ , we change  $\lambda$  for a smaller value and repeat the process. (e)(f)  $f(\lambda)m_\lambda$  exceeds  $\alpha$ , which indicates that  $f(\lambda)$  is too large to control a FWER less than  $\alpha$ . From the results,  $f(\lambda + 1)$  is the largest value, and  $m_{\lambda+1}$  is the optimal Bonferroni factor.



## Supporting Table

### Supporting Table S1.

#### List of significant motif combinations.

These tables include the statistically significant motif combinations detected by LAMP and the Bonferroni correction. Both results have the possibility to contain significant combinations that do not have higher-arity effect since motif combinations including a very significant motif may become significant even if there is no synergetic effect. To select the significant combinations caused by higher-arity effect, the combinations whose subsets had smaller  $p$ -value than the original one were removed.

**Supporting Table S1A.** The significant motif combinations in yeast. The yeast gene expression data consist of 173 different stress environments. We computed the combinatorial regulations for each environment. In total 173 experiments were performed. The gene expressions are classified into two groups with three different thresholds: 0.5, 1.0, 1.5 and 2.0. The number of motifs is 102.

**Supporting Table S1B.** The significant motif combinations in EGF-induced cells. This table contains the significant motif combinations from human breast cancer cells that were induced by EGF. The gene expression profiles were obtained from cells treated with four different doses (0.1, 0.5, 1 and 10 nM) of EGF for seven different time points (5, 10, 15, 30, 45, 60 (except 10 nM) and 90 min). The dataset contains 27 samples. We computed the combinatorial regulations for each sample. A gene was considered up-regulated if its log-fold change expressions, as compared to the control condition, was higher than 0.5, 1.0, 1.5 or 2.0. The number of motifs is 397.

**Supporting Table S1C.** The significant motif combinations in HRG-induced cells. This table includes all of the statistically significant motif combinations that were induced by HRG. The gene expression profiles were obtained from cells treated with four different doses (0.1, 0.5, 1 and 10 nM) of HRG for seven different time points (5, 10, 15, 30, 45, 60 and 90 min). Thus, this dataset contains 28 samples. We computed the combinatorial regulations for each sample. A gene was considered up-regulated if its log-fold change expressions, as compared to the control condition, was higher than 0.5, 1.0, 1.5 or 2.0. The number of motifs is 397.

The columns in these tables are:

- Sample: Sample name.
- Motif Combination: Significant motif combinations. “-” indicates that no significant result can be found from the sample.
- Arity: Arity of the motif combination
- # of target genes: The number of genes targeted by the motif combination.

- For each threshold:
  - LAMP ( $m'$ ): The optimized Bonferroni factor used in the LAMP
  - Adjusted  $p$ -value: The adjusted  $p$ -value used by the LAMP. The red numbers indicate that these are significant (adjusted  $p$ -value  $< 0.05$ ). “-” indicates that the combination cannot be found by this condition. The LAMP does not need to limit the maximum arity.
  - Bonferroni ( $\leq S$ ):  $p$ -value adjusted by the Bonferroni correction. The arity limit was varied from 2 to 5. “-” indicates that the combination cannot be found by this condition. For example, if the  $p$ -value of a 3-motif combination cannot be found when the arity limit is 2, then the cell is “-”.







|                               |                                                                    |                                      |                                              |     |          |          |          |          |          |        |          |          |          |          |          |     |          |          |          |          |          |       |          |         |       |          |          |          |          |          |
|-------------------------------|--------------------------------------------------------------------|--------------------------------------|----------------------------------------------|-----|----------|----------|----------|----------|----------|--------|----------|----------|----------|----------|----------|-----|----------|----------|----------|----------|----------|-------|----------|---------|-------|----------|----------|----------|----------|----------|
| redo                          | MSN2                                                               | 1                                    | 20                                           | -   | -        | -        | -        | -        | -        | 0.0076 | 0.102    | >1       | >1       | >1       | -        | -   | -        | -        | -        | -        | -        | -     | -        | -       | -     |          |          |          |          |          |
| 2.5mM DTT<br>005 min dtt-1    | FHL1                                                               | 1                                    | 81                                           | 268 | 1.96E-12 | 3.84E-11 | 1.29E-09 | 3.24E-08 | 6.41E-07 | 358    | -        | -        | -        | -        | -        | 490 | -        | -        | -        | -        | -        | -     | -        | -       | 644   |          |          |          |          |          |
| 2.5mM DTT<br>015 min dtt-1    | -                                                                  | -                                    | -                                            | 258 | -        | -        | -        | -        | -        | 492    | -        | -        | -        | -        | -        | 492 | -        | -        | -        | -        | -        | -     | -        | -       | 492   |          |          |          |          |          |
| 2.5mM DTT<br>030 min dtt-1    | YAP7<br>YAP1<br>HAP1, YAP1                                         | 1<br>1<br>2                          | 54<br>16<br>2                                | 252 | 0.0154   | 0.322    | >1       | >1       | >1       | 327    | 0.000306 | 0.00492  | 0.166    | >1       | >1       | 472 | 0.000273 | 0.00304  | 0.103    | >1       | >1       | -     | -        | -       | 472   |          |          |          |          |          |
| 2.5mM DTT<br>045 min dtt-1    | HSF1<br>YAP7<br>YAP1                                               | 1<br>1<br>1                          | 67<br>57<br>16                               | 274 | 0.0183   | 0.351    | >1       | >1       | >1       | 356    | -        | -        | -        | -        | -        | 356 | -        | -        | -        | -        | -        | -     | -        | -       | 505   |          |          |          |          |          |
| 2.5mM DTT<br>060 min dtt-1    | HSF1<br>MSN2<br>STE12<br>YAP7<br>YAP1                              | 1<br>1<br>1<br>1<br>1                | 59<br>18<br>97<br>58<br>16                   | 218 | 3.68E-05 | 0.000887 | 0.0299   | 0.747    | >1       | 354    | -        | -        | -        | -        | -        | 354 | -        | -        | -        | -        | -        | -     | -        | -       | 487   |          |          |          |          |          |
| 2.5mM DTT<br>090 min dtt-1    | STE12                                                              | 1                                    | 104                                          | 230 | 0.0021   | 0.048    | >1       | >1       | >1       | 380    | 0.000453 | 0.00626  | 0.211    | >1       | >1       | 380 | -        | -        | -        | -        | -        | -     | -        | -       | 536   |          |          |          |          |          |
| 2.5mM DTT<br>120 min dtt-1    | STE12                                                              | 1                                    | 103                                          | 229 | 0.000562 | 0.0129   | 0.434    | >1       | >1       | 288    | 2.32E-05 | 0.000424 | 0.0143   | 0.357    | >1       | 385 | -        | -        | -        | -        | -        | -     | -        | -       | 527   |          |          |          |          |          |
| 2.5mM DTT<br>180 min dtt-1    | STE12                                                              | 1                                    | 95                                           | 216 | 0.00202  | 0.0492   | >1       | >1       | >1       | 280    | 0.0272   | 0.51     | >1       | >1       | >1       | 372 | -        | -        | -        | -        | -        | -     | -        | -       | 372   |          |          |          |          |          |
| dtt 000 min<br>dtt            | FHL1<br>SFP1                                                       | 1<br>1                               | 85<br>20                                     | 235 | 1.76E-23 | 3.94E-22 | 1.33E-20 | 3.32E-19 | 6.58E-18 | 403    | 3.06E-31 | 3.99E-30 | 1.35E-28 | 3.37E-27 | 6.67E-26 | 553 | -        | -        | -        | -        | -        | -     | -        | -       | 553   |          |          |          |          |          |
| dtt 015 min<br>dtt-2          | FHL1<br>SFP1                                                       | 1<br>1                               | 86<br>20                                     | 233 | 5.48E-21 | 1.24E-19 | 4.16E-18 | 1.04E-16 | 2.06E-15 | 398    | 2.59E-07 | 3.42E-06 | 0.000115 | 0.00288  | 0.0571   | 549 | -        | -        | -        | -        | -        | -     | -        | -       | -     |          |          |          |          |          |
| dtt 030 min<br>dtt-2          | FHL1<br>YAP1<br>SFP1                                               | 1<br>1<br>1                          | 87<br>17<br>20                               | 301 | 2.00E-20 | 3.50E-19 | 1.18E-17 | 2.95E-16 | 5.84E-15 | 553    | -        | -        | -        | -        | -        | 701 | -        | -        | -        | -        | -        | -     | -        | -       | 701   |          |          |          |          |          |
| dtt 060 min<br>dtt-2          | CAD1, YAP7<br>YAP7<br>YAP1                                         | 2<br>1<br>1                          | 12<br>65<br>17                               | 303 | 0.000437 | 0.00762  | 0.257    | >1       | >1       | 553    | 0.0428   | 0.406    | >1       | >1       | >1       | 553 | -        | -        | -        | -        | -        | -     | -        | -       | 553   |          |          |          |          |          |
| dtt 120 min<br>dtt-2          | STE12<br>RPN4<br>TYE7<br>STE12, DIG1                               | 1<br>1<br>1<br>2                     | 104<br>63<br>34<br>58                        | 236 | 5.98E-07 | 1.33E-05 | 0.000449 | 0.0112   | 0.222    | 401    | -        | -        | -        | -        | -        | 548 | -        | -        | -        | -        | -        | -     | -        | -       | 694   |          |          |          |          |          |
| dtt 240 min<br>dtt-2          | SKN7<br>HSF1<br>HAP4<br>MSN2<br>RLM1                               | 1<br>1<br>1<br>1<br>1                | 73<br>70<br>26<br>21<br>9                    | 195 | 0.00177  | 0.0476   | >1       | >1       | >1       | 301    | -        | -        | -        | -        | -        | 399 | -        | -        | -        | -        | -        | -     | -        | -       | 550   |          |          |          |          |          |
| dtt 480 min<br>dtt-2          | SWI6<br>SWI4<br>TEC1<br>NRG1<br>SKN7<br>SOK2<br>RLM1               | 1<br>1<br>1<br>1<br>1<br>1<br>1      | 88<br>66<br>34<br>54<br>73<br>41<br>9        | 303 | 7.06E-11 | 1.22E-09 | 4.12E-08 | 1.03E-06 | 2.04E-05 | 398    | 0.000379 | 0.00501  | 0.169    | >1       | >1       | 548 | -        | -        | -        | -        | -        | -     | -        | -       | 548   |          |          |          |          |          |
| 1.5 mM<br>diamide (5<br>min)  | HSF1<br>YAP7<br>MSN4<br>MSN2<br>YAP1<br>SKN7, NRG1<br>STB5<br>CIN5 | 1<br>1<br>1<br>1<br>1<br>2<br>1<br>1 | 70<br>64<br>25<br>21<br>17<br>8<br>15<br>52  | 299 | 1.17E-20 | 2.05E-19 | 6.90E-18 | 1.73E-16 | 3.42E-15 | 399    | 3.87E-13 | 5.09E-12 | 1.72E-10 | 4.29E-09 | 8.50E-08 | 548 | 0.00503  | 0.0482   | >1       | >1       | >1       | -     | -        | -       | 548   |          |          |          |          |          |
| 1.5 mM<br>diamide (10<br>min) | HSF1<br>YAP7<br>HAP4<br>RPN4<br>MSN4<br>MSN2<br>YAP1<br>STB5       | 1<br>1<br>1<br>1<br>1<br>1<br>1<br>1 | 70<br>64<br>27<br>61<br>25<br>21<br>17<br>15 | 195 | 3.34E-12 | 9.01E-11 | 3.03E-09 | 7.59E-08 | 1.50E-06 | 304    | 3.59E-22 | 6.21E-21 | 2.09E-19 | 5.23E-18 | 1.04E-16 | 401 | 1.11E-12 | 1.45E-11 | 4.89E-10 | 1.22E-08 | 2.42E-07 | 0.127 | 0.000262 | 0.00343 | 0.116 | >1       | >1       | 0.000239 |          |          |
| 1.5 mM<br>diamide (20<br>min) | HSF1<br>RPN4<br>YAP7<br>MSN4<br>MSN2<br>STB5<br>YAP1<br>SNT2       | 1<br>1<br>1<br>1<br>1<br>1<br>1<br>1 | 70<br>61<br>64<br>25<br>21<br>14<br>17<br>18 | 195 | 7.60E-12 | 2.05E-10 | 6.90E-09 | 1.73E-07 | 3.42E-06 | 304    | 2.13E-15 | 3.68E-14 | 1.24E-12 | 3.10E-11 | 6.14E-10 | 402 | 6.43E-16 | 8.41E-15 | 2.83E-13 | 7.08E-12 | 1.40E-10 | -     | -        | -       | 402   | 5.89E-10 | 7.70E-09 | 2.59E-07 | 6.49E-06 | 0.000129 |
| 1.5 mM<br>diamide (30<br>min) | RPN4<br>YAP7<br>HSF1<br>MSN4<br>MSN2<br>STB5                       | 1<br>1<br>1<br>1<br>1<br>1           | 62<br>65<br>70<br>25<br>21<br>15             | 195 | 3.71E-09 | 1.00E-07 | 3.37E-06 | 8.43E-05 | 0.00167  | 306    | 3.40E-11 | 5.83E-10 | 1.96E-08 | 4.91E-07 | 9.74E-06 | 402 | -        | -        | -        | -        | -        | -     | -        | -       | 402   | -        | -        | -        | -        | -        |
| 1.5 mM<br>diamide (40<br>min) | HSF1<br>RPN4<br>YAP7<br>MSN4<br>MSN2<br>AFI2<br>STB5               | 1<br>1<br>1<br>1<br>1<br>1<br>1      | 70<br>61<br>65<br>25<br>21<br>58<br>15       | 195 | 3.27E-10 | 8.81E-09 | 2.97E-07 | 7.42E-06 | 0.000147 | 300    | 2.85E-12 | 5.00E-11 | 1.68E-09 | 4.21E-08 | 8.34E-07 | 399 | 1.03E-09 | 1.35E-08 | 4.56E-07 | 1.14E-05 | 0.000226 | -     | -        | -       | 399   | 0.000274 | 0.0036   | 0.121    | >1       | >1       |
| 1.5 mM<br>diamide (50<br>min) | HSF1<br>RPN4<br>YAP7<br>MSN4<br>MSN2<br>STB5                       | 1<br>1<br>1<br>1<br>1<br>1           | 69<br>61<br>65<br>25<br>21<br>14             | 195 | 5.35E-12 | 1.44E-10 | 4.86E-09 | 1.21E-07 | 2.41E-06 | 305    | 1.34E-10 | 2.30E-09 | 7.75E-08 | 1.94E-06 | 3.84E-05 | 402 | 6.29E-08 | 8.22E-07 | 2.77E-05 | 0.000692 | 0.0137   | -     | -        | -       | 402   | 0.00646  | 0.0844   | >1       | >1       | >1       |
| 1.5 mM<br>diamide (60<br>min) | HSF1<br>RPN4                                                       | 1<br>1                               | 70<br>61                                     | 194 | 2.06E-14 | 5.56E-13 | 1.87E-11 | 4.69E-10 | 9.29E-09 | 303    | 9.40E-14 | 1.63E-12 | 5.49E-11 | 1.37E-09 | 2.72E-08 | 401 | 8.52E-09 | 1.12E-07 | 3.76E-06 | 9.40E-05 | 0.00186  | -     | -        | -       | 401   | 2.59E-06 | 3.39E-05 | 0.00114  | 0.0285   | 0.566    |









|                                       |           |   |    |              |          |          |          |          |              |          |          |          |          |              |          |          |          |          |              |          |          |          |          |        |
|---------------------------------------|-----------|---|----|--------------|----------|----------|----------|----------|--------------|----------|----------|----------|----------|--------------|----------|----------|----------|----------|--------------|----------|----------|----------|----------|--------|
| phase 8 h ypd-1                       | BAS1      | 1 | 21 | 0.0129       | 0.426    | > 1      | > 1      | > 1      | 0.000246     | 0.0052   | 0.175    | > 1      | > 1      | 1.48E-08     | 2.37E-07 | 8.00E-06 | 0.0002   | 0.00396  | 7.59E-11     | 8.42E-10 | 2.83E-08 | 7.09E-07 | 1.41E-05 |        |
|                                       | NRG1      | 1 | 48 | 0.0271       | 0.895    | > 1      | > 1      | > 1      |              |          |          |          |          |              |          |          |          |          |              |          |          |          |          |        |
| YPD stationary phase 12 h             | HAP4      | 1 | 27 | 142 9.25E-05 | 0.00342  | 0.115    | > 1      | > 1      | 191 2.90E-08 | 7.97E-07 | 2.68E-05 | 0.000671 | 0.0133   | 297 1.53E-10 | 2.70E-09 | 9.09E-08 | 2.27E-06 | 4.51E-05 | 297 2.87E-13 | 5.07E-12 | 1.71E-10 | 4.27E-09 | 8.46E-08 |        |
|                                       | MSN2      | 1 | 21 | 0.0152       | 0.563    | > 1      | > 1      | > 1      | 0.0357       | 0.98     | > 1      | > 1      | > 1      | 0.00868      | 0.153    | > 1      | > 1      | > 1      |              |          |          |          |          |        |
|                                       | MSN4      | 1 | 25 |              |          |          |          |          |              |          |          |          |          |              |          |          |          |          | 0.00053      | 0.00937  | 0.316    | > 1      | > 1      |        |
| YPD stationary phase 1 d ypd-1        | HAP4      | 1 | 27 | 191 3.71E-06 | 0.000102 | 0.00344  | 0.086    | > 1      | 230 2.42E-09 | 5.54E-08 | 1.87E-06 | 4.67E-05 | 0.000925 | 299 5.10E-12 | 8.96E-11 | 3.02E-09 | 7.55E-08 | 1.50E-06 | 395 4.30E-11 | 5.72E-10 | 1.93E-08 | 4.82E-07 | 9.56E-06 |        |
|                                       | SKN7      | 1 | 73 | 0.000659     | 0.0181   | 0.611    | > 1      | > 1      | 0.0223       | 0.509    | > 1      | > 1      | > 1      | 0.0316       | 0.555    | > 1      | > 1      | > 1      |              |          |          |          |          |        |
|                                       | GLN3      | 1 | 33 | 0.018        | 0.494    | > 1      | > 1      | > 1      |              |          |          |          |          |              |          |          |          |          |              |          |          |          |          |        |
|                                       | MSN2      | 1 | 21 |              |          |          |          |          | 0.0005       | 0.0114   | 0.385    | > 1      | > 1      | 0.000333     | 0.00585  | 0.197    | > 1      | > 1      | 0.0134       | 0.179    | > 1      | > 1      | > 1      |        |
|                                       | UME6      | 1 | 93 |              |          |          |          |          | 0.00779      | 0.178    | > 1      | > 1      | > 1      | 0.00595      | 0.105    | > 1      | > 1      | > 1      | 0.0446       | 0.593    | > 1      | > 1      | > 1      |        |
|                                       | SKO1      | 1 | 6  |              |          |          |          |          | 0.0464       | > 1      | > 1      | > 1      | > 1      |              |          |          |          |          |              |          |          |          |          |        |
|                                       | MSN4      | 1 | 25 |              |          |          |          |          |              |          |          |          |          | 0.00232      | 0.0408   | > 1      | > 1      | > 1      | 0.0051       | 0.0678   | > 1      | > 1      | > 1      |        |
|                                       | HAP1      | 1 | 45 |              |          |          |          |          |              |          |          |          |          |              |          |          |          |          | 0.0148       | 0.197    | > 1      | > 1      | > 1      |        |
| YPD stationary phase 2 d ypd-1        | HAP4      | 1 | 27 | 161 1.62E-06 | 5.27E-05 | 0.00178  | 0.0444   | 0.88     | 228 5.55E-08 | 1.28E-06 | 4.31E-05 | 0.00108  | 0.0214   | 295 2.91E-06 | 5.18E-05 | 0.00175  | 0.0437   | 0.885    | 391 0.0242   | 0.325    | > 1      | > 1      | > 1      |        |
|                                       | SKN7      | 1 | 72 | 0.00106      | 0.0345   | > 1      | > 1      | > 1      | 0.000988     | 0.0228   | 0.767    | > 1      | > 1      |              |          |          |          |          |              |          |          |          |          |        |
|                                       | HSF1      | 1 | 70 | 0.0108       | 0.354    | > 1      | > 1      | > 1      | 0.000142     | 0.00328  | 0.111    | > 1      | > 1      |              |          |          |          |          | 0.0311       | 0.418    | > 1      | > 1      | > 1      |        |
|                                       | SOK2      | 1 | 41 | 0.0211       | 0.688    | > 1      | > 1      | > 1      |              |          |          |          |          |              |          |          |          |          |              |          |          |          |          |        |
|                                       | MSN4      | 1 | 25 |              |          |          |          |          | 0.00553      | 0.127    | > 1      | > 1      | > 1      | 0.00741      | 0.132    | > 1      | > 1      | > 1      | 0.013        | 0.174    | > 1      | > 1      | > 1      |        |
|                                       | MSN2      | 1 | 21 |              |          |          |          |          | 0.0219       | 0.504    | > 1      | > 1      | > 1      | 0.00989      | 0.176    | > 1      | > 1      | > 1      | 0.00295      | 0.0397   | > 1      | > 1      | > 1      |        |
|                                       | SUT1      | 1 | 15 |              |          |          |          |          | 0.0243       | 0.559    | > 1      | > 1      | > 1      |              |          |          |          |          |              |          |          |          |          |        |
|                                       | UME6      | 1 | 91 |              |          |          |          |          |              |          |          |          |          |              |          |          |          |          | 0.0375       | 0.504    | > 1      | > 1      | > 1      |        |
| YPD stationary phase 3 d ypd-1        | HAP4      | 1 | 27 | 164 0.000163 | 0.00522  | 0.176    | > 1      | > 1      | 226 6.30E-06 | 0.000147 | 0.00494  | 0.123    | > 1      | 295 1.88E-06 | 3.35E-05 | 0.00113  | 0.0282   | 0.56     | 295          |          |          |          |          |        |
|                                       | MSN2      | 1 | 21 | 0.000703     | 0.0225   | 0.759    | > 1      | > 1      |              |          |          |          |          |              |          |          |          |          |              | 0.00757  | 0.135    | > 1      | > 1      | > 1    |
|                                       | HSF1      | 1 | 70 | 0.0102       | 0.327    | > 1      | > 1      | > 1      | 5.46E-05     | 0.00127  | 0.0428   | > 1      | > 1      | 0.00103      | 0.0184   | 0.618    | > 1      | > 1      | 0.0079       | 0.141    | > 1      | > 1      | > 1      |        |
|                                       | SUT1      | 1 | 15 | 0.0255       | 0.818    | > 1      | > 1      | > 1      | 0.00907      | 0.211    | > 1      | > 1      | > 1      |              |          |          |          |          |              |          |          |          |          |        |
|                                       | SOK2      | 1 | 40 | 0.0303       | 0.971    | > 1      | > 1      | > 1      | 0.0145       | 0.336    | > 1      | > 1      | > 1      | 0.0306       | 0.545    | > 1      | > 1      | > 1      |              |          |          |          |          |        |
|                                       | SKN7      | 1 | 72 |              |          |          |          |          | 0.0371       | 0.861    | > 1      | > 1      | > 1      |              |          |          |          |          |              |          |          |          |          |        |
|                                       | MSN4      | 1 | 24 |              |          |          |          |          |              |          |          |          |          | 0.0177       | 0.316    | > 1      | > 1      | > 1      | 0.0027       | 0.0481   | > 1      | > 1      | > 1      |        |
| YPD stationary phase 5 d ypd-1        | GAL4      | 1 | 13 | 163 0.00148  | 0.0476   | > 1      | > 1      | > 1      | 183 0.0251   | 0.72     | > 1      | > 1      | > 1      | 293          |          |          |          |          |              |          |          |          |          |        |
|                                       | HAP4      | 1 | 27 | 0.0308       | 0.994    | > 1      | > 1      | > 1      | 2.25E-05     | 0.000645 | 0.0217   | 0.544    | > 1      | 0.0293       | 0.525    | > 1      | > 1      | > 1      | 0.0102       | 0.182    | > 1      | > 1      | > 1      |        |
|                                       | SUT1      | 1 | 15 |              |          |          |          |          | 0.0168       | 0.481    | > 1      | > 1      | > 1      | 0.0267       | 0.479    | > 1      | > 1      | > 1      | 0.00611      | 0.11     | > 1      | > 1      | > 1      |        |
|                                       | HAP3      | 1 | 13 | 0.00148      | 0.0476   | > 1      | > 1      | > 1      | 0.0251       | 0.72     | > 1      | > 1      | > 1      |              |          |          |          |          |              |          |          |          |          |        |
|                                       | UME6      | 1 | 92 |              |          |          |          |          |              |          |          |          |          | 0.0225       | 0.404    | > 1      | > 1      | > 1      | 0.025        | 0.449    | > 1      | > 1      | > 1      |        |
|                                       | PHD1      | 1 | 33 |              |          |          |          |          |              |          |          |          |          |              |          |          |          |          | 0.00953      | 0.171    | > 1      | > 1      | > 1      |        |
| YPD stationary phase 7 d ypd-1        | GAL4      | 1 | 14 | 163 0.00039  | 0.0126   | 0.424    | > 1      | > 1      | 231          |          |          |          |          | 290          |          |          |          |          |              |          |          |          |          |        |
|                                       | SOK2      | 1 | 40 | 0.00153      | 0.0494   | > 1      | > 1      | > 1      |              |          |          |          |          |              |          |          |          |          |              |          |          |          |          |        |
|                                       | HAP4      | 1 | 26 | 0.0109       | 0.352    | > 1      | > 1      | > 1      | 0.00192      | 0.0436   | > 1      | > 1      | > 1      |              |          |          |          |          |              |          |          |          |          |        |
|                                       | PHD1      | 1 | 32 |              |          |          |          |          | 0.0106       | 0.242    | > 1      | > 1      | > 1      | 0.0078       | 0.141    | > 1      | > 1      | > 1      |              |          |          |          |          |        |
|                                       | UME6      | 1 | 93 |              |          |          |          |          |              |          |          |          |          |              |          |          |          |          |              |          |          |          |          |        |
| YPD stationary                        | UME6      | 1 | 80 | 173          |          |          |          |          | 204 0.0373   | 0.96     | > 1      | > 1      | > 1      | 254 0.00196  | 0.0405   | > 1      | > 1      | > 1      | 345 0.0119   | 0.182    | > 1      | > 1      | > 1      |        |
|                                       | SOK2      | 1 | 35 |              |          |          |          |          |              |          |          |          |          |              |          |          |          |          |              | 0.0341   | 0.519    | > 1      | > 1      | > 1    |
| YPD stationary phase 22 d             | YAP7      | 1 | 62 | 164 0.00361  | 0.116    | > 1      | > 1      | > 1      | 229 0.0467   | > 1      | > 1      | > 1      | > 1      | 297          |          |          |          |          |              |          |          |          |          |        |
|                                       | MSN4      | 1 | 24 | 0.0271       | 0.868    | > 1      | > 1      | > 1      |              |          |          |          |          |              |          |          |          |          |              |          |          |          |          |        |
|                                       | UME6      | 1 | 92 | 0.0467       | > 1      | > 1      | > 1      | > 1      | 0.0029       | 0.0665   | > 1      | > 1      | > 1      | 0.00242      | 0.0429   | > 1      | > 1      | > 1      | 0.00303      | 0.0536   | > 1      | > 1      | > 1      |        |
| YPD stationary phase 28 d             | YAP7      | 1 | 62 | 162 0.018    | 0.583    | > 1      | > 1      | > 1      | 228 0.00511  | 0.118    | > 1      | > 1      | > 1      | 292          |          |          |          |          |              |          |          |          |          |        |
|                                       | UME6      | 1 | 90 |              |          |          |          |          | 0.000638     | 0.0147   | 0.495    | > 1      | > 1      | 0.000867     | 0.0156   | 0.525    | > 1      | > 1      | 0.000673     | 0.0121   | 0.408    | > 1      | > 1      |        |
|                                       | SUT1      | 1 | 15 |              |          |          |          |          |              |          |          |          |          |              |          |          |          |          | 0.0313       | 0.562    | > 1      | > 1      | > 1      |        |
| DBY7286 37degree heat - 20 min        | HSF1      | 1 | 68 | 234 1.02E-13 | 2.28E-12 | 7.69E-11 | 1.92E-09 | 3.81E-08 | 303 2.39E-18 | 4.15E-17 | 1.40E-15 | 3.49E-14 | 6.93E-13 | 401 1.01E-15 | 1.32E-14 | 4.44E-13 | 1.11E-11 | 2.20E-10 | 401 6.63E-13 | 8.68E-12 | 2.92E-10 | 7.31E-09 | 1.45E-07 |        |
|                                       | RPN4      | 1 | 64 | 9.53E-10     | 2.14E-08 | 7.21E-07 | 1.80E-05 | 0.000357 | 0.000183     | 0.00317  | 0.107    | > 1      | > 1      |              |          |          |          |          |              |          |          |          |          |        |
|                                       | MSN2      | 1 | 21 | 4.12E-06     | 9.24E-05 | 0.00311  | 0.0779   | > 1      | 1.73E-06     | 3.00E-05 | 0.00101  | 0.0253   | 0.5      | 0.00691      | 0.0906   | > 1      | > 1      | > 1      |              |          |          |          |          |        |
|                                       | MSN4      | 1 | 24 | 0.000514     | 0.0115   | 0.389    | > 1      | > 1      |              |          |          |          |          |              |          |          |          |          |              | 0.0099   | 0.13     | > 1      | > 1      | > 1    |
|                                       | NRG1      | 1 | 57 | 0.019        | 0.426    | > 1      | > 1      | > 1      |              |          |          |          |          |              |          |          |          |          |              |          |          |          |          |        |
|                                       | UME6      | 1 | 93 | 0.0316       | 0.71     | > 1      | > 1      | > 1      |              |          |          |          |          |              |          |          |          |          |              |          |          |          |          |        |
| DBYmsn2-4 37degree heat - 20 min      | HSF1      | 1 | 70 | 233 2.22E-14 | 5.00E-13 | 1.68E-11 | 4.21E-10 | 8.35E-09 | 398 6.38E-25 | 8.43E-24 | 2.84E-22 | 7.10E-21 | 1.41E-19 | 398 6.52E-25 | 8.60E-24 | 2.90E-22 | 7.25E-21 | 1.44E-19 | 548 2.98E-23 | 2.86E-22 | 9.62E-21 | 2.41E-19 | 4.77E-18 |        |
|                                       | RPN4      | 1 | 63 | 7.63E-14     | 1.72E-12 | 5.80E-11 | 1.45E-09 | 2.87E-08 | 1.93E-09     | 2.55E-08 | 8.59E-07 | 2.15E-05 | 0.000426 |              |          |          |          |          |              |          |          |          |          |        |
|                                       | MOT3      | 1 | 13 |              |          |          |          |          | 0.00289      | 0.0382   | > 1      | > 1      | > 1      | 6.31E-06     | 8.33E-05 | 0.00281  | 0.0702   | > 1      |              |          |          |          |          |        |
|                                       | RLM1      | 1 | 9  |              |          |          |          |          | 0.00572      | 0.0755   | > 1      | > 1      | > 1      |              |          |          |          |          |              |          |          |          |          |        |
|                                       | AFT2_GCN4 | 2 | 3  |              |          |          |          |          | 0.0299       | 0.395    | > 1      | > 1      | > 1      |              |          |          |          |          |              |          |          |          |          |        |
|                                       | UME6      | 1 | 94 |              |          |          |          |          |              |          |          |          |          | 0.0305       | 0.402    | > 1      | > 1      | > 1      |              |          |          |          |          |        |
| DBYmsn2/4 (real strain) + 37degrees   | RPN4      | 1 | 64 | 240 1.33E-11 | 2.91E-10 | 9.80E-09 | 2.45E-07 | 4.86E-06 | 405 2.61E-05 | 0.000338 | 0.0114   | 0.285    | > 1      | 556          |          |          |          |          |              |          |          |          |          |        |
|                                       | HSF1      | 1 | 70 | 1.49E-08     | 3.26E-07 | 1.10E-05 | 0.000275 | 0.00545  | 1.29E-13     | 1.67E-12 | 5.64E-11 | 1.41E-09 | 2.79E-08 | 4.57E-12     | 4.32E-11 | 1.46E-09 | 3.64E-08 | 7.21E-07 | 5.56         | 1.11E-07 | 1.05E-06 | 3.54E-05 | 0.000885 | 0.0175 |
|                                       | CBF1_PHO2 | 2 | 4  |              |          |          |          |          |              |          |          |          |          |              |          |          |          |          |              | 0.0213   | 0.202    | > 1      | > 1      | > 1    |
| DBYyap1 37degree heat - 20 min (redo) | HSF1      | 1 | 69 | 234 2.02E-13 | 4.53E-12 | 1.53E-10 | 3.82E-09 | 7.57E-08 | 401 1.08E-17 | 1.41E-16 | 4.75E-15 | 1.19E-13 | 2.35E-12 | 401 5.48E-15 | 7.18E-14 | 2.42E-12 | 6.05E-11 | 1.20E-09 | 401 1.21E-12 | 1.59E-11 | 5.34E-10 | 1.34E-08 | 2.65E-07 |        |
|                                       | RPN4      | 1 | 64 | 7.39E-08     | 1.66E-06 | 5.59E-05 | 0.0014   | 0.0277   |              |          |          |          |          |              |          |          |          |          |              |          |          |          |          |        |
|                                       | MSN2      | 1 | 21 | 2.01E-06     | 4.51E-05 | 0.00152  | 0.038    | 0.753    | 4.16E-07     | 5.45E-06 | 0.000183 | 0.00459  | 0.091    | 0.000248     | 0.00325  | 0.11     | > 1      | > 1      | 0.00544      | 0.0713   | > 1      | > 1      |          |        |





B. EGF (human breast cancer cell)

| Condition                                  | Motif Combination                                              | Arity | # of target genes | Adjusted p-value (exp > 0.5) |                                            |            |         |       | Adjusted p-value (exp > 1.0) |                                            |            |          |         | Adjusted p-value (exp > 1.5) |                                            |            |          |          | Adjusted p-value (exp > 2.0) |               |            |         |          |          |          |        |    |
|--------------------------------------------|----------------------------------------------------------------|-------|-------------------|------------------------------|--------------------------------------------|------------|---------|-------|------------------------------|--------------------------------------------|------------|----------|---------|------------------------------|--------------------------------------------|------------|----------|----------|------------------------------|---------------|------------|---------|----------|----------|----------|--------|----|
|                                            |                                                                |       |                   | LAMP                         |                                            | Bonferroni |         |       | LAMP                         |                                            | Bonferroni |          |         | LAMP                         |                                            | Bonferroni |          |          | LAMP                         |               | Bonferroni |         |          |          |          |        |    |
|                                            |                                                                |       |                   | m'                           | Arity limit 2                              | 3          | 4       | 5     | m'                           | Arity limit 2                              | 3          | 4        | 5       | m'                           | Arity limit 2                              | 3          | 4        | 5        | m'                           | Arity limit 2 | 3          | 4       | 5        |          |          |        |    |
| m=79,003 10,428,793 1,029,883,108 8.12E+10 |                                                                |       |                   |                              | m=79,003 10,428,793 1,029,883,108 8.12E+10 |            |         |       |                              | m=79,003 10,428,793 1,029,883,108 8.12E+10 |            |          |         |                              | m=79,003 10,428,793 1,029,883,108 8.12E+10 |            |          |          |                              |               |            |         |          |          |          |        |    |
| 0.1nM 5min                                 | TATA                                                           | 1     | 957               | 1459869                      | 0.00389                                    | 2.10E-04   | 0.0278  | >1    | >1                           | 3750336                                    | 0.000511   | 1.08E-05 | 0.00142 | 0.14                         | >1                                         | 5238103    | 2.26E-06 | 3.41E-08 | 4.51E-06                     | 0.000445      | 0.0351     | 7247034 | 0.000123 | 1.34E-06 | 0.000176 | 0.0174 | >1 |
|                                            | MEIS1, LMO2, COM, AR                                           | 3     | 14                |                              | 0.03                                       | -          | 0.214   | >1    | >1                           |                                            | -          | -        | -       | -                            | -                                          |            | -        | -        | -                            | -             | -          | -       | -        | -        | -        | -      | -  |
|                                            | GATA6                                                          | 1     | 160               |                              | 0.49                                       | 0.0265     | >1      | >1    | >1                           |                                            | -          | -        | -       | -                            | -                                          |            | 0.0237   | 0.000357 | 0.0472                       | >1            | >1         |         | -        | -        | -        | -      | -  |
|                                            | CTGYNNCTYTAA, TGACATY                                          | 2     | 12                |                              | -                                          | -          | -       | -     | -                            | 1.03                                       | 0.0217     | >1       | >1      | >1                           |                                            |            | -        | -        | -                            | -             | -          |         | -        | -        | -        | -      | -  |
|                                            | MEF2, AACTTT                                                   | 2     | 198               |                              | -                                          | -          | -       | -     | -                            | -                                          | -          | -        | -       | -                            |                                            | 1.59       | 0.024    | >1       | >1                           | >1            |            | -       | -        | -        | -        | -      | -  |
|                                            | RSRFC4, IK1                                                    | 2     | 26                |                              | -                                          | -          | -       | -     | -                            | -                                          | -          | -        | -       | -                            |                                            | 1.77       | 0.0266   | >1       | >1                           | >1            |            | 0.376   | 0.0041   | 0.541    | >1       | >1     |    |
| 0.1nM 10min                                | TATA                                                           | 1     | 957               | 1459869                      | -                                          | -          | -       | -     | -                            | 3750336                                    | -          | -        | -       | -                            | -                                          | 5238103    | 0.175    | 0.00264  | 0.349                        | >1            | >1         | 7247034 | -        | -        | -        | -      | -  |
| 0.1nM 15min                                | TATA                                                           | 1     | 957               | 1459869                      | -                                          | -          | -       | -     | -                            | 3750336                                    | 1.1        | 0.0232   | >1      | >1                           | >1                                         | 5238103    | -        | -        | -                            | -             | -          | 7247034 | -        | -        | -        | -      | -  |
| 0.1nM 30min                                | CTGCAGY, LEF1, VDR, MAZ                                        | 4     | 28                | 1459869                      | 0.0177                                     | -          | -       | >1    | >1                           | 3750336                                    | -          | -        | -       | -                            | -                                          | 5238103    | -        | -        | -                            | -             | -          | 7247034 | -        | -        | -        | -      | -  |
|                                            | TATA                                                           | 1     | 957               |                              | 0.877                                      | 0.0475     | >1      | >1    | >1                           |                                            | 0.000437   | 9.21E-06 | 0.00122 | 0.12                         | >1                                         |            | 0.0041   | 6.19E-05 | 0.00816                      | 0.806         | >1         |         | 0.284    | 0.00309  | 0.409    | >1     | >1 |
|                                            | AACTTT, CART1                                                  | 2     | 71                |                              | -                                          | -          | -       | -     | -                            |                                            | 0.000791   | 1.67E-05 | 0.0022  | 0.217                        | >1                                         |            | 0.326    | 0.00492  | 0.649                        | >1            | >1         |         | -        | -        | -        | -      | -  |
|                                            | CP2, CTGCAGY, LEF1, MAZ, STAT5A                                | 5     | 9                 |                              | -                                          | -          | -       | -     | -                            |                                            | 0.00157    | -        | -       | >1                           |                                            |            | -        | -        | -                            | -             | -          |         | -        | -        | -        | -      | -  |
|                                            | CP2, CTGCAGY, LEF1, MAZ, AACTTT                                | 5     | 18                |                              | -                                          | -          | -       | -     | -                            |                                            | 0.0127     | -        | -       | >1                           |                                            |            | -        | -        | -                            | -             | -          |         | -        | -        | -        | -      | -  |
|                                            | CP2, CTGCAGY, AACTTT, LEF1, CTTTAAAR                           | 5     | 10                |                              | -                                          | -          | -       | -     | -                            |                                            | 0.0144     | -        | -       | >1                           |                                            |            | -        | -        | -                            | -             | -          |         | -        | -        | -        | -      | -  |
|                                            | OCT, NFAT                                                      | 2     | 115               |                              | -                                          | -          | -       | -     | -                            |                                            | 0.0804     | 0.00169  | 0.223   | >1                           | >1                                         |            | -        | -        | -                            | -             | -          |         | -        | -        | -        | -      | -  |
|                                            | AAAYRNCTG, CART1                                               | 2     | 18                |                              | -                                          | -          | -       | -     | -                            |                                            | -          | -        | -       | -                            | -                                          |            | 1        | 0.0151   | >1                           | >1            | >1         |         | -        | -        | -        | -      | -  |
|                                            | AAAYRNCTG, NKX61                                               | 2     | 19                |                              | -                                          | -          | -       | -     | -                            |                                            | -          | -        | -       | -                            | -                                          |            | 1.81     | 0.0272   | >1                           | >1            | >1         |         | -        | -        | -        | -      | -  |
|                                            | MEF2, GATA6                                                    | 2     | 38                |                              | -                                          | -          | -       | -     | -                            |                                            | -          | -        | -       | -                            | -                                          |            | -        | -        | -                            | -             | -          |         | 3.13     | 0.0341   | >1       | >1     | >1 |
| 0.1nM 45min                                | -                                                              | -     | -                 | 1969633                      | -                                          | -          | -       | -     | -                            | 3750336                                    | -          | -        | -       | -                            | -                                          | 5238103    | -        | -        | -                            | -             | -          | 7247034 | -        | -        | -        | -      | -  |
| 0.1nM 60min                                | NFAT, AACTTT                                                   | 2     | 425               | 1969633                      | 0.423                                      | 0.017      | >1      | >1    | >1                           | 3750336                                    | -          | -        | -       | -                            | -                                          | 5238103    | -        | -        | -                            | -             | -          | 7247034 | -        | -        | -        | -      | -  |
|                                            | TATA                                                           | 1     | 957               |                              | 0.619                                      | 0.0248     | >1      | >1    | >1                           |                                            | 0.395      | 0.00832  | >1      | >1                           | >1                                         |            | 0.109    | 0.00165  | 0.218                        | >1            | >1         |         | -        | -        | -        | -      | -  |
| 0.1nM 90min                                | SRF, FREAC3                                                    | 2     | 16                | 1969633                      | 0.954                                      | 0.0383     | >1      | >1    | >1                           | 3750336                                    | -          | -        | -       | -                            | -                                          | 5238103    | -        | -        | -                            | -             | -          | 7247034 | -        | -        | -        | -      | -  |
| 0.5nM 5min                                 | AACTTT, CART1                                                  | 2     | 71                | 1459869                      | -                                          | -          | -       | -     | -                            | 3750336                                    | 0.421      | 0.00887  | >1      | >1                           | >1                                         | 5238103    | -        | -        | -                            | -             | -          | 7247034 | -        | -        | -        | -      | -  |
|                                            | E12, AACTTT                                                    | 2     | 401               |                              | -                                          | -          | -       | -     | -                            |                                            | 1.7        | 0.0358   | >1      | >1                           | >1                                         |            | -        | -        | -                            | -             | -          |         | -        | -        | -        | -      | -  |
|                                            | TATA                                                           | 1     | 957               |                              | -                                          | -          | -       | -     | -                            |                                            | -          | -        | -       | -                            | -                                          |            | 0.0603   | 0.000909 | 0.12                         | >1            | >1         |         | 0.348    | 0.00379  | 0.501    | >1     | >1 |
|                                            | CTGCAGY, OCT1, PAX4, MSX1, AACTTT                              | 5     | 6                 |                              | -                                          | -          | -       | -     | -                            |                                            | -          | -        | -       | -                            | -                                          |            | -        | -        | -                            | -             | -          |         | 0.0398   | -        | -        | -      | >1 |
| 0.5nM 10min                                | NFAT, AACTTT                                                   | 2     | 425               | 1459869                      | 0.409                                      | 0.0221     | >1      | >1    | >1                           | 3750336                                    | 0.0802     | 0.00169  | 0.223   | >1                           | >1                                         | 5238103    | -        | -        | -                            | -             | -          | 7247034 | -        | -        | -        | -      | -  |
|                                            | TATA                                                           | 1     | 957               |                              | -                                          | -          | -       | -     | -                            |                                            | 0.00066    | 1.39E-05 | 0.00184 | 0.181                        | >1                                         |            | 0.0595   | 0.000898 | 0.119                        | >1            | >1         |         | 1.83     | 0.02     | >1       | >1     | >1 |
|                                            | WWTAAAGGC, NF1                                                 | 2     | 27                |                              | -                                          | -          | -       | -     | -                            |                                            | -          | -        | -       | -                            | -                                          |            | -        | -        | -                            | -             | -          |         | 0.125    | 0.00136  | 0.18     | >1     | >1 |
| 0.5nM 15min                                | TATA                                                           | 1     | 957               | 1969633                      | 0.194                                      | 0.00776    | >1      | >1    | >1                           | 3750336                                    | 0.00139    | 2.93E-05 | 0.00387 | 0.382                        | >1                                         | 5238103    | 0.00112  | 1.69E-05 | 0.00224                      | 0.221         | >1         | 7247034 | 0.134    | 0.00146  | 0.192    | >1     | >1 |
|                                            | GATA6, CREB, GR, EVI1, CTTTAAAR, LEF1, OCT1, NFAT, FOXO4, CEBP | 8     | 8                 |                              | -                                          | -          | -       | -     | -                            |                                            | 0.0137     | -        | -       | -                            | -                                          |            | -        | -        | -                            | -             | -          |         | -        | -        | -        | -      | -  |
|                                            | GATA6, FOXO4                                                   | 2     | 63                |                              | -                                          | -          | -       | -     | -                            |                                            | 0.904      | 0.019    | >1      | >1                           | >1                                         |            | -        | -        | -                            | -             | -          |         | -        | -        | -        | -      | -  |
|                                            | MEF2, E12, TGACATY, OCT1, AP1                                  | 5     | 13                |                              | -                                          | -          | -       | -     | -                            |                                            | -          | -        | -       | -                            | -                                          |            | 0.0198   | -        | -                            | -             | >1         |         | -        | -        | -        | -      | -  |
|                                            | GATA6, PIT1                                                    | 2     | 11                |                              | -                                          | -          | -       | -     | -                            |                                            | -          | -        | -       | -                            | -                                          |            | 2.84     | 0.0428   | >1                           | >1            | >1         |         | -        | -        | -        | -      | -  |
| 0.5nM 30min                                | NFAT, AACTTT                                                   | 2     | 425               | 1459869                      | 0.042                                      | 0.00227    | 0.3     | >1    | >1                           | 2700718                                    | -          | -        | -       | -                            | -                                          | 5238103    | -        | -        | -                            | -             | -          | 7247034 | -        | -        | -        | -      | -  |
|                                            | TATA                                                           | 1     | 957               |                              | 0.155                                      | 0.00838    | >1      | >1    | >1                           |                                            | 0.00211    | 6.18E-05 | 0.00816 | 0.805                        | >1                                         |            | -        | -        | -                            | -             | -          |         | -        | -        | -        | -      | -  |
|                                            | NFAT, AREB6                                                    | 2     | 288               |                              | 0.156                                      | 0.00847    | >1      | >1    | >1                           |                                            | -          | -        | -       | -                            | -                                          |            | -        | -        | -                            | -             | -          |         | -        | -        | -        | -      | -  |
|                                            | E12                                                            | 1     | 1491              |                              | 0.65                                       | 0.0352     | >1      | >1    | >1                           |                                            | -          | -        | -       | -                            | -                                          |            | -        | -        | -                            | -             | -          |         | -        | -        | -        | -      | -  |
| 0.5nM 45min                                | FOXO4, SRF                                                     | 2     | 100               | 1969633                      | 0.000403                                   | 1.62E-05   | 0.00213 | 0.211 | >1                           | 3750336                                    | 0.0223     | 0.00047  | 0.062   | >1                           | >1                                         | 5238103    | -        | -        | -                            | -             | -          | 7247034 | -        | -        | -        | -      | -  |
|                                            | YY1, SRF, AACTTT                                               | 3     | 23                |                              | 0.00534                                    | -          | 0.0283  | >1    | >1                           |                                            | -          | -        | -       | -                            | -                                          |            | -        | -        | -                            | -             | -          |         | -        | -        | -        | -      | -  |
|                                            | HFH8, E4F1, CREB                                               | 3     | 11                |                              | 0.00646                                    | -          | 0.0342  | >1    | >1                           |                                            | -          | -        | -       | -                            | -                                          |            | -        | -        | -                            | -             | -          |         | -        | -        | -        | -      | -  |
|                                            | SRF, HNF3                                                      | 2     | 54                |                              | 0.0455                                     | 0.00183    | 0.241   | >1    | >1                           |                                            | -          | -        | -       | -                            | -                                          |            | -        | -        | -                            | -             | -          |         | -        | -        | -        | -      | -  |
|                                            | SRF, FREAC2                                                    | 2     | 65                |                              | 0.08                                       | 0.00321    | 0.424   | >1    | >1                           |                                            | -          | -        | -       | -                            | -                                          |            | -        | -        | -                            | -             | -          |         | -        | -        | -        | -      | -  |
|                                            | NFAT, AACTTT                                                   | 2     | 425               |                              | 0.278                                      | 0.0112     | >1      | >1    | >1                           |                                            | 0.00138    | 2.90E-05 | 0.00383 | 0.378                        | >1                                         |            | -        | -        | -                            | -             | -          |         | -        | -        | -        | -      | -  |
|                                            | SRF, ATF, AACTTT                                               | 3     | 16                |                              | -                                          | -          | -       | -     | -                            |                                            | 0.00113    | -        | 0.00314 | 0.31                         | >1                                         |            | -        | -        | -                            | -             | -          |         | -        | -        | -        | -      | -  |
|                                            | YY1, SRF, NFKB, AACTTT                                         | 4     | 9                 |                              | -                                          | -          | -       | -     | -                            |                                            | 0.00127    | -        | -       | 0.348                        | >1                                         |            | -        | -        | -                            | -             | -          |         | -        | -        | -        | -      | -  |
|                                            | TATA                                                           | 1     | 957               |                              | 0.00405                                    | 8.53E-05   | 0.0113  | >1    | >1                           |                                            | 0.00405    | 8.53E-05 | 0.0113  | >1                           | >1                                         |            | 0.000145 | 2.19E-06 | 0.000289                     | 0.0286        | >1         |         | -        | -        | -        | -      | -  |
|                                            | GATA6                                                          | 1     | 160               |                              | 0.0504                                     | 0.00106    | 0.14    | >1    | >1                           |                                            | 0.0504     | 0.00106  | 0.14    | >1                           | >1                                         |            | -        | -        | -                            | -             | -          |         | -        | -        | -        | -      | -  |
|                                            | NFAT, CART1                                                    | 2     | 62                |                              | 0.744                                      | 0.0157     | >1      | >1    | >1                           |                                            | 0.744      | 0.0157   | >1      | >1                           | >1                                         |            | -        | -        | -                            | -             | -          |         | -        | -        | -        | -      | -  |
|                                            | NF1, E2F                                                       | 2     | 57                |                              | -                                          | -          | -       | -     | -                            |                                            | 0.836      | 0.0176   | >1      | >1                           | >1                                         |            | -        | -        | -                            | -             | -          |         | -        | -        | -        | -      | -  |
| 0.5nM 60min                                | CTGCAGY, LEF1, CREB, AREB6, AACTTT                             | 5     | 15                | 1969633                      | 0.000776                                   | -          | -       | -     | >1                           | 3750336                                    | -          | -        | -       | -                            | -                                          | 5238103    | -        | -        | -                            | -             | -          | 7247034 | -        | -        | -        | -      | -  |
|                                            | LEF1, E12, CREB, AACTTT                                        | 4     | 35                |                              | 0.008                                      | -          | -       | >1    | >1                           |                                            | -          | -        | -       | -                            | -                                          |            | -        | -        | -                            | -             | -          |         |          |          |          |        |    |

|                                             |                                                 |                                    |     |         |         |         |          |        |       |         |          |          |        |    |    |         |          |          |          |        |    |         |         |          |        |    |    |    |   |
|---------------------------------------------|-------------------------------------------------|------------------------------------|-----|---------|---------|---------|----------|--------|-------|---------|----------|----------|--------|----|----|---------|----------|----------|----------|--------|----|---------|---------|----------|--------|----|----|----|---|
| 0.5nM 90min                                 | LEF1, CTGCAGY, TATA, VDR, MAZ                   | 5                                  | 9   | 1969633 | -       | -       | -        | -      | -     | 3750336 | 0.0457   | -        | -      | -  | -  | >1      | 5238103  | -        | -        | -      | -  | -       | 7247034 | -        | -      | -  | -  | -  | - |
|                                             | MYC, TATA, CREB, CREBP1, FOXO4                  | 5                                  | 7   |         | -       | -       | -        | -      | -     |         | -        | -        | -      | -  | -  | -       | -        | 0.00345  | -        | -      | -  | -       | >1      | -        | -      | -  | -  | -  | - |
|                                             | E12, AACCTT, LEF1, TATA, OCT1, NFAT, CREB       | 7                                  | 8   |         | -       | -       | -        | -      | -     |         | -        | -        | -      | -  | -  | -       | -        | 0.0264   | -        | -      | -  | -       | -       | -        | -      | -  | -  | -  | - |
| 1.0nM 5min                                  | TATA                                            | 1                                  | 957 | 1459869 | -       | -       | -        | -      | -     | 3750336 | 0.0181   | 0.00038  | 0.0502 | >1 | >1 | 5238103 | 0.000195 | 2.94E-06 | 0.000388 | 0.0384 | >1 | 7247034 | 0.026   | 0.000283 | 0.0374 | >1 | >1 |    |   |
|                                             | AACCTT, CART1                                   | 2                                  | 71  |         | -       | -       | -        | -      | -     |         | -        | -        | -      | -  | -  |         | 0.102    | 0.00154  | 0.204    | >1     | >1 |         | 0.323   | 0.00352  | 0.465  | >1 | >1 |    |   |
|                                             | NFAT, CART1                                     | 2                                  | 62  |         | -       | -       | -        | -      | -     |         | -        | -        | -      | -  | -  |         | 2.33     | 0.0351   | >1       | >1     | >1 |         | -       | -        | -      | -  | -  | -  |   |
| 1.0nM 10min                                 | YY1, LEF1, NF1, NFAT                            | 4                                  | 26  | 1459869 | 0.015   | -       | -        | >1     | >1    | 3750336 | -        | -        | -      | -  | -  | 5238103 | -        | -        | -        | -      | -  | 7247034 | -       | -        | -      | -  | -  | -  |   |
|                                             | CRX, AACCTT                                     | 2                                  | 69  |         | 0.0268  | 0.00145 | 0.192    | >1     | >1    |         | 0.216    | 0.00455  | 0.601  | >1 | >1 |         | -        | -        | -        | -      | -  |         | -       | -        | -      | -  | -  | -  |   |
|                                             | E12, AACCTT                                     | 2                                  | 401 |         | 0.0577  | 0.00312 | 0.412    | >1     | >1    |         | -        | -        | -      | -  | -  |         | -        | -        | -        | -      | -  |         | -       | -        | -      | -  | -  | -  |   |
|                                             | NFAT, AACCTT                                    | 2                                  | 425 |         | 0.0613  | 0.00332 | 0.438    | >1     | >1    |         | 2.01     | 0.0424   | >1     | >1 | >1 |         | -        | -        | -        | -      | -  |         | -       | -        | -      | -  | -  | -  |   |
|                                             | AREB6, AACCTT                                   | 2                                  | 274 |         | 0.483   | 0.0262  | >1       | >1     | >1    |         | -        | -        | -      | -  | -  |         | -        | -        | -        | -      | -  |         | -       | -        | -      | -  | -  | -  |   |
|                                             | TATA                                            | 1                                  | 957 |         | -       | -       | -        | -      | -     |         | 0.411    | 0.00865  | >1     | >1 | >1 |         | 0.0522   | 0.000787 | 0.104    | >1     | >1 |         | -       | -        | -      | -  | -  | -  |   |
|                                             | AACCTT, CART1                                   | 2                                  | 71  |         | -       | -       | -        | -      | -     |         | 1.77     | 0.0373   | >1     | >1 | >1 |         | -        | -        | -        | -      | -  |         | -       | -        | -      | -  | -  | -  |   |
|                                             | FOXO4, TAAYNRNNTCC                              | 2                                  | 44  |         | -       | -       | -        | -      | -     |         | -        | -        | -      | -  | -  |         | 1.7      | 0.0257   | >1       | >1     | >1 |         | -       | -        | -      | -  | -  | -  |   |
|                                             | 1.0nM 15min                                     | NFAT, AACCTT                       | 2   | 425     | 1459869 | 0.00601 | 0.000325 | 0.0429 | >1    | >1      | 3750336  | -        | -      | -  | -  | -       | 5238103  | -        | -        | -      | -  | -       | 7247034 | -        | -      | -  | -  | -  | - |
| TATA                                        | 1                                               | 957                                |     | 0.282   | 0.0153  | >1      | >1       | >1     |       | 0.0149  | 0.000313 | 0.0413   | >1     | >1 |    | 0.0245  | 0.00037  | 0.0488   | >1       | >1     |    | 0.101   | 0.0011  | 0.145    | >1     | >1 |    |    |   |
| FOXO3, HNF3                                 | 2                                               | 51                                 |     | 0.595   | 0.0322  | >1      | >1       | >1     |       | -       | -        | -        | -      | -  |    | -       | -        | -        | -        | -      |    | -       | -       | -        | -      | -  | -  |    |   |
| HFH8, GATA6, CTGYNNCTYTAA, AACCTT           | 2                                               | 10                                 |     | -       | -       | -       | -        | -      |       | -       | -        | -        | -      | -  |    | 2.25    | 0.0339   | >1       | >1       | >1     |    | -       | -       | -        | -      | -  | -  |    |   |
| 2                                           | 19                                              |                                    | -   | -       | -       | -       | -        | -      |       | -       | -        | -        | -      | -  |    | -       | -        | -        | -        | -      |    | 3.67    | 0.04    | >1       | >1     | >1 |    |    |   |
| 1.0nM 30min                                 | NFAT, AREB6, AACCTT                             | 3                                  | 138 | 1459869 | 0.0206  | -       | 0.147    | >1     | >1    | 3750336 | -        | -        | -      | -  | -  | 5238103 | -        | -        | -        | -      | -  | 7247034 | -       | -        | -      | -  | -  | -  |   |
|                                             | TATA                                            | 1                                  | 957 |         | 0.0757  | 0.00409 | 0.54     | >1     | >1    |         | 0.0319   | 0.000672 | 0.0887 | >1 | >1 |         | 0.00233  | 3.52E-05 | 0.00465  | 0.459  | >1 |         | -       | -        | -      | -  | -  | -  |   |
|                                             | ATF6, CTTTAAR                                   | 2                                  | 16  |         | 0.217   | 0.0117  | >1       | >1     | >1    |         | -        | -        | -      | -  | -  |         | -        | -        | -        | -      | -  |         | -       | -        | -      | -  | -  | -  |   |
|                                             | ATF6, SP1                                       | 2                                  | 40  |         | 0.723   | 0.0391  | >1       | >1     | >1    |         | -        | -        | -      | -  | -  |         | -        | -        | -        | -      | -  |         | -       | -        | -      | -  | -  | -  |   |
|                                             | LEF1, CDPCR3HD, OCT1, MSX1, AACCTT              | 5                                  | 8   |         | -       | -       | -        | -      | -     |         | 0.0401   | -        | -      | -  | >1 |         | -        | -        | -        | -      | -  |         | 0.0087  | -        | -      | -  | -  | >1 |   |
|                                             | YNGTINNNATT, AACCTT                             | 2                                  | 100 |         | -       | -       | -        | -      | -     |         | 0.383    | 0.00807  | >1     | >1 | >1 |         | -        | -        | -        | -      | -  |         | -       | -        | -      | -  | -  | -  |   |
|                                             | NFAT, AACCTT                                    | 2                                  | 425 |         | -       | -       | -        | -      | -     |         | 0.411    | 0.00867  | >1     | >1 | >1 |         | -        | -        | -        | -      | -  |         | -       | -        | -      | -  | -  | -  |   |
|                                             | OCT, NFAT                                       | 2                                  | 115 |         | -       | -       | -        | -      | -     |         | 0.873    | 0.0184   | >1     | >1 | >1 |         | -        | -        | -        | -      | -  |         | -       | -        | -      | -  | -  | -  |   |
|                                             | LEF1, NFAT                                      | 2                                  | 497 |         | -       | -       | -        | -      | -     |         | 1.35     | 0.0285   | >1     | >1 | >1 |         | -        | -        | -        | -      | -  |         | -       | -        | -      | -  | -  | -  |   |
| SREBP1, MSX1                                | 2                                               | 27                                 |     | -       | -       | -       | -        | -      |       | -       | -        | -        | -      | -  |    | -       | -        | -        | -        | -      |    | 4.29    | 0.0468  | >1       | >1     | >1 |    |    |   |
| 1.0nM 45min                                 | HFH4, NFAT, E4F1, AACCTT                        | 4                                  | 11  | 1459869 | 0.0173  | -       | -        | >1     | >1    | 3750336 | -        | -        | -      | -  | -  | 5238103 | -        | -        | -        | -      | -  | 7247034 | -       | -        | -      | -  | -  | -  |   |
|                                             | CTGCAGY, LEF1, AREB6, AACCTT                    | 4                                  | 51  |         | 0.0175  | -       | -        | >1     | >1    |         | -        | -        | -      | -  | -  |         | -        | -        | -        | -      | -  |         | -       | -        | -      | -  | -  | -  |   |
|                                             | YY1, NF1, NFAT, AACCTT                          | 4                                  | 23  |         | 0.0251  | -       | -        | >1     | >1    |         | -        | -        | -      | -  | -  |         | -        | -        | -        | -      | -  |         | -       | -        | -      | -  | -  | -  |   |
|                                             | TATA, OCT1, CREB, NFAT, AACCTT                  | 5                                  | 15  |         | 0.0445  | -       | -        | -      | >1    |         | -        | -        | -      | -  | -  |         | -        | -        | -        | -      | -  |         | -       | -        | -      | -  | -  | -  |   |
|                                             | YY1, CHX10, NFAT, AACCTT                        | 4                                  | 17  |         | 0.045   | -       | -        | >1     | >1    |         | -        | -        | -      | -  | -  |         | -        | -        | -        | -      | -  |         | -       | -        | -      | -  | -  | -  |   |
|                                             | SRF, HNF3                                       | 2                                  | 54  |         | 0.0918  | 0.00497 | 0.656    | >1     | >1    |         | -        | -        | -      | -  | -  |         | -        | -        | -        | -      | -  |         | -       | -        | -      | -  | -  | -  |   |
|                                             | AACCTT, CART1                                   | 2                                  | 71  |         | 0.708   | 0.0383  | >1       | >1     | >1    |         | 0.00375  | 7.89E-05 | 0.0104 | >1 | >1 |         | -        | -        | -        | -      | -  |         | -       | -        | -      | -  | -  | -  |   |
|                                             | MEIS1, LEF1, NFAT, NKX62                        | 4                                  | 23  |         | -       | -       | -        | -      | -     |         | 0.00895  | -        | -      | -  | >1 | >1      |          | -        | -        | -      | -  |         | -       | -        | -      | -  | -  | -  |   |
|                                             | TATA, OCT1, NFAT, AACCTT                        | 4                                  | 74  |         | -       | -       | -        | -      | -     |         | 0.0105   | -        | -      | >1 | >1 |         | -        | -        | -        | -      | -  |         | -       | -        | -      | -  | -  | -  |   |
|                                             | MEIS1, NFAT, AACCTT                             | 3                                  | 97  |         | -       | -       | -        | -      | -     |         | 0.0209   | -        | 0.0581 | >1 | >1 |         | -        | -        | -        | -      | -  |         | -       | -        | -      | -  | -  | -  |   |
|                                             | NFAT, CART1                                     | 2                                  | 62  |         | -       | -       | -        | -      | -     |         | 0.0259   | 0.000545 | 0.0719 | >1 | >1 |         | -        | -        | -        | -      | -  |         | -       | -        | -      | -  | -  | -  |   |
|                                             | IRF7, PPAR                                      | 2                                  | 8   |         | -       | -       | -        | -      | -     |         | 0.0307   | 0.000647 | 0.0854 | >1 | >1 |         | -        | -        | -        | -      | -  |         | -       | -        | -      | -  | -  | -  |   |
|                                             | MEF2, CIZ                                       | 2                                  | 32  |         | -       | -       | -        | -      | -     |         | 0.28     | 0.00591  | 0.78   | >1 | >1 |         | -        | -        | -        | -      | -  |         | -       | -        | -      | -  | -  | -  |   |
|                                             | IK3, AACCTT                                     | 2                                  | 57  |         | -       | -       | -        | -      | -     |         | 0.726    | 0.0153   | >1     | >1 | >1 |         | -        | -        | -        | -      | -  |         | -       | -        | -      | -  | -  | -  |   |
|                                             | HFH4, CREB                                      | 2                                  | 23  |         | -       | -       | -        | -      | -     |         | 1.32     | 0.0278   | >1     | >1 | >1 |         | -        | -        | -        | -      | -  |         | -       | -        | -      | -  | -  | -  |   |
|                                             | AACCTT, PPAR                                    | 2                                  | 55  |         | -       | -       | -        | -      | -     |         | 1.94     | 0.0408   | >1     | >1 | >1 |         | -        | -        | -        | -      | -  |         | -       | -        | -      | -  | -  | -  |   |
|                                             | TATA                                            | 1                                  | 957 |         | -       | -       | -        | -      | -     |         | -        | -        | -      | -  | -  |         | 0.0791   | 0.00119  | 0.157    | >1     | >1 |         | -       | -        | -      | -  | -  | -  |   |
|                                             | NFAT, AACCTT, LEF1, CHX10, LHX3, STAT5A, STAT5B | 7                                  | 6   |         | -       | -       | -        | -      | -     |         | -        | -        | -      | -  | -  |         | -        | -        | -        | -      | -  |         | 0.0184  | -        | -      | -  | -  | -  |   |
|                                             | 1.0nM 60min                                     | MAZ, E12, CREB, ATF4               | 4   | 15      | 1969633 | 0.0007  | -        | -      | 0.366 | >1      | 3750336  | -        | -      | -  | -  | -       | 5238103  | -        | -        | -      | -  | -       | 7247034 | -        | -      | -  | -  | -  | - |
|                                             |                                                 | CTGCAGY, LEF1, PAX4, AREB6, AACCTT | 5   | 29      |         | 0.0304  | -        | -      | -     | >1      |          | -        | -      | -  | -  | -       |          | -        | -        | -      | -  | -       |         | -        | -      | -  | -  | -  | - |
| MEIS1, NFAT, FREAC2                         |                                                 | 3                                  | 64  |         | 0.0312  | -       | 0.165    | >1     | >1    |         | -        | -        | -      | -  | -  |         | -        | -        | -        | -      | -  |         | -       | -        | -      | -  | -  | -  |   |
| NFAT, STAT5A, AACCTT                        |                                                 | 3                                  | 106 |         | 0.0486  | -       | 0.257    | >1     | >1    |         | -        | -        | -      | -  | -  |         | -        | -        | -        | -      | -  |         | -       | -        | -      | -  | -  | -  |   |
| LEF1, NFAT                                  |                                                 | 2                                  | 497 |         | 1.13    | 0.0453  | >1       | >1     | >1    |         | -        | -        | -      | -  | -  |         | -        | -        | -        | -      | -  |         | -       | -        | -      | -  | -  | -  |   |
| LEF1, TATA, NFAT, NFKB, AACCTT              |                                                 | 5                                  | 20  |         | -       | -       | -        | -      | -     |         | 0.00725  | -        | -      | -  | >1 |         | -        | -        | -        | -      | -  |         | -       | -        | -      | -  | -  | -  |   |
| EVH1, MEF2, LEF1, TATA, SREBP1, NFAT, FOXO4 |                                                 | 7                                  | 10  |         | -       | -       | -        | -      | -     |         | 0.0207   | -        | -      | -  | -  |         | -        | -        | -        | -      | -  |         | -       | -        | -      | -  | -  | -  |   |
| PTF1BETA, LEF1, NFAT, CREB, AACCTT          |                                                 | 5                                  | 8   |         | -       | -       | -        | -      | -     |         | 0.024    | -        | -      | -  | >1 |         | -        | -        | -        | -      | -  |         | -       | -        | -      | -  | -  | -  |   |
| MEF2, LEF1, POU6F1, FOXO4, AR               |                                                 | 5                                  | 8   |         | -       | -       | -        | -      | -     |         | 0.024    | -        | -      | -  | >1 |         | -        | -        | -        | -      | -  |         | -       | -        | -      | -  | -  | -  |   |



|                 |                                          |      |     |          |          |          |          |          |        |         |         |          |          |          |          |          |         |         |          |          |        |         |         |         |          |        |    |
|-----------------|------------------------------------------|------|-----|----------|----------|----------|----------|----------|--------|---------|---------|----------|----------|----------|----------|----------|---------|---------|----------|----------|--------|---------|---------|---------|----------|--------|----|
| 0min            | NFAT, AACTTT                             | 2    | 425 | 6.54E-05 | 3.54E-06 | 0.000467 | 0.0461   | >1       |        | 0.593   | 0.0173  | >1       | >1       | >1       |          |          |         |         |          |          |        |         |         |         |          |        |    |
|                 | OCT, OCT1, NFAT                          | 3    | 90  | 0.00161  | -        | 0.0115   | >1       | >1       |        | -       | -       | -        | -        | -        | -        | -        | -       | -       | -        | -        | -      | -       | -       |         |          |        |    |
|                 | E12, AACTTT                              | 2    | 401 | 0.00311  | 0.000168 | 0.0222   | >1       | >1       |        | 0.17    | 0.00498 | 0.657    | >1       | >1       |          |          |         |         |          |          |        |         |         |         |          |        |    |
|                 | E12, OCT, LEF1, OCT1                     | 4    | 44  | 0.0113   | -        | -        | >1       | >1       |        | -       | -       | -        | -        | -        | -        | -        | -       | -       | -        | -        | -      | -       | -       |         |          |        |    |
|                 | E12, FOXO4, SOX5                         | 3    | 45  | 0.0226   | -        | 0.162    | >1       | >1       |        | -       | -       | -        | -        | -        | -        | -        | -       | -       | -        | -        | -      | -       | -       |         |          |        |    |
|                 | ETS2, FOXO4                              | 2    | 208 | 0.276    | 0.015    | -        | >1       | >1       |        | -       | -       | -        | -        | -        | -        | -        | -       | -       | -        | -        | -      | -       | -       |         |          |        |    |
|                 | SRF, SRF                                 | 2    | 29  | 0.442    | 0.0239   | >1       | >1       | >1       |        | -       | -       | -        | -        | -        | -        | -        | -       | -       | -        | -        | -      | -       | -       |         |          |        |    |
|                 | TFIIA                                    | 1    | 180 | 0.662    | 0.0358   | >1       | >1       | >1       |        | -       | -       | -        | -        | -        | -        | -        | -       | -       | -        | -        | -      | -       | -       |         |          |        |    |
|                 | FOXO4, PITX2                             | 2    | 160 | 0.83     | 0.0449   | >1       | >1       | >1       |        | -       | -       | -        | -        | -        | -        | -        | -       | -       | -        | -        | -      | -       | -       |         |          |        |    |
|                 | NFAT, CART1                              | 2    | 62  | -        | -        | -        | -        | -        |        | 0.121   | 0.00355 | 0.468    | >1       | >1       |          |          |         |         |          |          |        |         |         |         |          |        |    |
|                 | AACTTT, CART1                            | 2    | 71  | -        | -        | -        | -        | -        |        | 0.561   | 0.0164  | >1       | >1       | >1       |          |          |         |         |          |          |        |         |         |         |          |        |    |
|                 | OCT1, MEIS1, LEF1, E12, NFAT, AP1        | 6    | 17  | -        | -        | -        | -        | -        |        | -       | -       | -        | -        | -        | -        | -        | -       | -       | -        | -        | -      | -       | -       |         |          |        |    |
|                 | FOXO4, CTCTAAR, MEIS1, E12, RSRFC4, NFAT | 6    | 11  | -        | -        | -        | -        | -        |        | -       | -       | -        | -        | -        | -        | -        | -       | -       | -        | -        | -      | -       | -       |         |          |        |    |
|                 |                                          |      |     |          |          |          |          |          |        |         |         |          |          |          |          |          |         |         |          |          |        |         |         | 0.0102  |          |        |    |
|                 |                                          |      |     |          |          |          |          |          |        |         |         |          |          |          |          |          |         |         |          |          |        |         |         | 0.0394  |          |        |    |
|                 | 10.0nM<br>45min                          | TATA | 1   | 957      | 2700718  | 3.96E-05 | 1.16E-06 | 0.000153 | 0.0151 | >1      | 3750336 | 2.37E-08 | 5.00E-10 | 6.60E-08 | 6.52E-06 | 0.000514 | 5238103 | 0.00023 | 3.47E-06 | 0.000458 | 0.0452 | >1      | 7247034 | 0.0497  | 0.000542 | 0.0716 | >1 |
|                 | MAZ, AACTTT, CREB, CREBP1, AREB6         | 5    | 12  |          | 0.0126   | -        | -        | -        | >1     |         |         |          |          |          |          |          |         |         |          |          |        |         |         |         |          |        |    |
|                 | ATF1, MAZ, AACTTT                        | 3    | 24  |          | 0.0158   | -        | 0.0611   | >1       | >1     |         |         |          |          |          |          |          |         |         |          |          |        |         |         |         |          |        |    |
|                 | HNF3ALPHA, OCT                           | 2    | 24  |          | 1.63     | 0.0476   | >1       | >1       | >1     |         |         |          |          |          |          |          |         |         |          |          |        |         |         |         |          |        |    |
|                 | PAX3, CREBP1                             | 2    | 30  |          | -        | -        | -        | -        | -      | 0.751   | 0.0158  | >1       | >1       | >1       |          |          |         |         |          |          |        |         |         |         |          |        |    |
|                 | OCT, NFAT                                | 2    | 115 |          | -        | -        | -        | -        | -      | 1.33    | 0.028   | >1       | >1       | >1       |          |          |         |         |          |          |        |         |         |         |          |        |    |
|                 | CREB, FOXO4, HFH3, CREBP1                | 4    | 8   |          | -        | -        | -        | -        | -      | -       | -       | -        | -        | -        |          | 0.0451   | -       | -       | -        | >1       | >1     |         |         |         |          |        |    |
|                 | CREBP1, AACTTT                           | 2    | 96  |          | -        | -        | -        | -        | -      | -       | -       | -        | -        | -        |          | 0.57     | 0.0086  | >1      | >1       | >1       |        |         |         |         |          |        |    |
|                 | FOXO4, TAAYNRRNTCC                       | 2    | 44  |          | -        | -        | -        | -        | -      | -       | -       | -        | -        | -        |          | 1.35     | 0.0204  | >1      | >1       | >1       |        |         |         |         |          |        |    |
|                 | ATF, CREBP1                              | 2    | 105 |          | -        | -        | -        | -        | -      | -       | -       | -        | -        | -        |          | 2.65     | 0.04    | >1      | >1       | >1       |        |         |         |         |          |        |    |
| 10.0nM<br>90min | CREB, FOXO4, E4F1, CREBP1                | 4    | 39  | 1969633  | 0.00995  | -        | -        | >1       | >1     | 3750336 | -       | -        | -        | -        | -        | 5238103  | -       | -       | -        | -        | -      | 7247034 | -       | -       | -        | -      |    |
|                 | NFAT, AACTTT                             | 2    | 425 |          | 0.022    | 0.000883 | 0.117    | >1       | >1     |         | 0.349   | 0.00736  | 0.971    | >1       | >1       |          |         |         |          |          |        |         |         |         |          |        |    |
|                 | AACTTT, CART1                            | 2    | 71  |          | 0.311    | 0.0125   | >1       | >1       | >1     |         | 1.01    | 0.0212   | >1       | >1       | >1       |          |         |         |          |          |        |         |         |         |          |        |    |
|                 | NF1                                      | 1    | 596 |          | 0.948    | 0.038    | >1       | >1       | >1     |         | -       | -        | -        | -        | -        |          |         |         |          |          |        |         |         |         |          |        |    |
|                 | CTGCAGY, LEF1, CREB, AREB6, AACTTT       | 5    | 15  |          | -        | -        | -        | -        | -      |         | 0.0165  | -        | -        | -        | >1       |          |         |         |          |          |        |         |         |         |          |        |    |
|                 | TATA                                     | 1    | 957 |          | -        | -        | -        | -        | -      |         | 0.0627  | 0.00132  | 0.174    | >1       | >1       |          | 0.783   | 0.0118  | >1       | >1       | >1     |         | 0.863   | 0.00941 | >1       | >1     |    |
|                 | HFH4, CREB                               | 2    | 23  |          | -        | -        | -        | -        | -      |         | 0.813   | 0.0171   | >1       | >1       | >1       |          | -       | -       | -        | -        | -      |         | -       | -       | -        |        |    |
|                 | NFAT, CART1                              | 2    | 62  |          | -        | -        | -        | -        | -      |         | 1.69    | 0.0356   | >1       | >1       | >1       |          | -       | -       | -        | -        | -      |         | -       | -       | -        |        |    |
|                 | AACTTT, LEF1, FREAC2, CTGCAGY, CREB, MAZ | 6    | 10  |          | -        | -        | -        | -        | -      |         | -       | -        | -        | -        | -        |          | 0.0308  | -       | -        | -        | -      |         | -       | -       | -        |        |    |



**C. HRG (human breast cancer cell)**

| condition   | Motif Combination                                                                                                                                                                                                                                                    | Arity                                               | # of target genes                                                    | Adjusted p-value (exp > 0.5) |               |          |            |        |    | Adjusted p-value (exp > 1.0) |          |          |            |       |               | Adjusted p-value (exp > 1.5) |         |         |            |               |       | Adjusted p-value (exp > 2.0) |         |    |               |   |   |
|-------------|----------------------------------------------------------------------------------------------------------------------------------------------------------------------------------------------------------------------------------------------------------------------|-----------------------------------------------------|----------------------------------------------------------------------|------------------------------|---------------|----------|------------|--------|----|------------------------------|----------|----------|------------|-------|---------------|------------------------------|---------|---------|------------|---------------|-------|------------------------------|---------|----|---------------|---|---|
|             |                                                                                                                                                                                                                                                                      |                                                     |                                                                      | LAMP                         |               |          | Bonferroni |        |    | LAMP                         |          |          | Bonferroni |       |               | LAMP                         |         |         | Bonferroni |               |       | LAMP                         |         |    | Bonferroni    |   |   |
|             |                                                                                                                                                                                                                                                                      |                                                     |                                                                      | m'                           | Arity limit 2 | 3        | 4          | 5      | m' | Arity limit 2                | 3        | 4        | 5          | m'    | Arity limit 2 | 3                            | 4       | 5       | m'         | Arity limit 2 | 3     | 4                            | 5       | m' | Arity limit 2 | 3 | 4 |
| 0.1nM 5min  | -                                                                                                                                                                                                                                                                    | -                                                   | -                                                                    | 1174108                      | -             | -        | -          | -      | -  | -                            | 2874627  | -        | -          | -     | -             | -                            | 5542428 | -       | -          | -             | -     | -                            | 7635557 | -  | -             | - | - |
| 0.1nM 10min | <i>MAZ, E12, SP1</i><br><i>E12, YATTNATC</i><br><i>ERR1, AP4</i>                                                                                                                                                                                                     | 3<br>2<br>2                                         | 227<br>83<br>162                                                     | 552135                       | 0.00197       | 0.0372   | >1         | >1     | >1 | 2099869                      | -        | -        | -          | -     | -             | -                            | 3982295 | -       | 0.262      | 0.00519       | 0.686 | >1                           | >1      | -  | -             | - | - |
| 0.1nM 15min | <i>MAZ</i><br><i>MAZ, E12</i><br><i>MAZ, AP4</i><br><i>ZIC1, E47</i><br><i>AP4</i><br><i>LEF1, CTGCAGY, E12, PAX4, MAZ</i><br><i>OP2, CTGCAGY, E12</i><br><i>E12, MAZ, NFAT, FOXO4</i>                                                                               | 1<br>2<br>2<br>2<br>1<br>5<br>3<br>4                | 1474<br>478<br>388<br>19<br>1016<br>38<br>28<br>87                   | 552135                       | 0.111         | 0.0159   | >1         | >1     | >1 | 1557482                      | -        | -        | -          | -     | -             | -                            | 3982295 | -       | 2.17       | 0.043         | >1    | >1                           | >1      | -  | -             | - | - |
| 0.1nM 30min | <i>MAZ, E12</i><br><i>ELK1, MYOD, ATF</i>                                                                                                                                                                                                                            | 2<br>3                                              | 478<br>11                                                            | 699536                       | 0.108         | 0.0122   | >1         | >1     | >1 | 2099869                      | 0.00328  | 0.000123 | 0.0163     | >1    | >1            | 3982295                      | -       | -       | -          | -             | -     | -                            | -       | -  | -             | - | - |
| 0.1nM 45min | <i>SP1</i><br><i>MAZ, E12</i><br><i>SRF, PAX3</i>                                                                                                                                                                                                                    | 1<br>2<br>2                                         | 1915<br>478<br>12                                                    | 699536                       | 0.0193        | 0.00218  | 0.288      | >1     | >1 | 2099869                      | -        | -        | -          | -     | -             | -                            | 3982295 | -       | -          | -             | -     | -                            | -       | -  | -             | - | - |
| 0.1nM 60min | <i>MAZ, E12</i><br><i>PAX4</i><br><i>ELK1, MYOD, ATF</i><br><i>MAZ</i><br><i>E12, PAX4</i><br><i>AP4</i><br><i>RFX1</i><br><i>TATA, NFKB</i>                                                                                                                         | 2<br>1<br>3<br>1<br>2<br>1<br>1<br>2                | 478<br>1182<br>11<br>1474<br>428<br>1016<br>296<br>75                | 552135                       | 0.00616       | 0.000882 | 0.116      | >1     | >1 | 1557482                      | -        | -        | -          | -     | -             | -                            | 3982295 | 0.00692 | 0.000137   | 0.0181        | >1    | >1                           | -       | -  | -             | - | - |
| 0.1nM 90min | <i>E12, PAX4</i><br><i>MAZ</i><br><i>ZIC1, E47</i>                                                                                                                                                                                                                   | 2<br>1<br>2                                         | 428<br>1474<br>19                                                    | 552135                       | 0.0224        | 0.0032   | 0.422      | >1     | >1 | 1557482                      | -        | -        | -          | -     | -             | -                            | 3982295 | 0.242   | 0.00481    | 0.635         | >1    | >1                           | -       | -  | -             | - | - |
| 0.5nM 5min  | <i>MAZ</i><br><i>AP4</i>                                                                                                                                                                                                                                             | 1<br>1                                              | 1474<br>1016                                                         | 699536                       | 0.0432        | 0.00488  | 0.644      | >1     | >1 | 2099869                      | -        | -        | -          | -     | -             | -                            | 3982295 | -       | -          | -             | -     | -                            | -       | -  | -             | - | - |
| 0.5nM 10min | <i>MAZ</i><br><i>SP1</i><br><i>MAZ, E12</i>                                                                                                                                                                                                                          | 1<br>1<br>2                                         | 1474<br>1915<br>478                                                  | 552135                       | 0.0425        | 0.00608  | 0.802      | >1     | >1 | 1557482                      | -        | -        | -          | -     | -             | -                            | 3982295 | -       | -          | -             | -     | -                            | -       | -  | -             | - | - |
| 0.5nM 15min | -                                                                                                                                                                                                                                                                    | -                                                   | -                                                                    | 552135                       | -             | -        | -          | -      | -  | 2099869                      | -        | -        | -          | -     | -             | -                            | 3982295 | -       | -          | -             | -     | -                            | -       | -  | -             | - | - |
| 0.5nM 30min | <i>MAZ</i><br><i>ELK1, MYOD, ATF</i><br><i>OCT, USF, OCT1, NFKB, AACTTT</i><br><i>SRF, PAX3</i>                                                                                                                                                                      | 1<br>3<br>5<br>2                                    | 1474<br>11<br>8<br>12                                                | 699536                       | 0.000982      | 0.000111 | 0.0146     | >1     | >1 | 2099869                      | 0.000921 | 3.47E-05 | 0.00457    | 0.452 | >1            | 3982295                      | -       | -       | -          | -             | -     | -                            | -       | -  | -             | - | - |
| 0.5nM 45min | <i>PAX4</i><br><i>MAZ</i><br><i>ETS2</i><br><i>SP1</i><br><i>AP4</i><br><i>SRF, PAX3</i>                                                                                                                                                                             | 1<br>1<br>1<br>1<br>1<br>2                          | 1182<br>1474<br>757<br>1915<br>1016<br>12                            | 699536                       | 0.00359       | 0.000406 | 0.0536     | >1     | >1 | 2099869                      | -        | -        | -          | -     | -             | -                            | 3982295 | -       | -          | -             | -     | -                            | -       | -  | -             | - | - |
| 0.5nM 60min | <i>SP1</i><br><i>MAZ</i><br><i>SRF, PAX3</i>                                                                                                                                                                                                                         | 1<br>1<br>2                                         | 1915<br>1474<br>12                                                   | 699536                       | 0.00278       | 0.000314 | 0.0414     | >1     | >1 | 2099869                      | -        | -        | -          | -     | -             | -                            | 3982295 | -       | -          | -             | -     | -                            | -       | -  | -             | - | - |
| 0.5nM 90min | <i>E12</i><br><i>MAZ, E12</i><br><i>E12, PAX4</i><br><i>MAZ, MYOD</i><br><i>MAZ, AP4</i><br><i>TATA</i>                                                                                                                                                              | 1<br>2<br>2<br>2<br>2<br>1                          | 1512<br>478<br>428<br>303<br>388<br>968                              | 552135                       | 3.17E-05      | 4.54E-06 | 0.000599   | 0.0592 | >1 | 1557482                      | -        | -        | -          | -     | -             | -                            | 3982295 | -       | -          | -             | -     | -                            | -       | -  | -             | - | - |
| 1.0nM 5min  | <i>MAZ, E12</i>                                                                                                                                                                                                                                                      | 2                                                   | 478                                                                  | 442874                       | 0.00753       | 0.00134  | 0.177      | >1     | >1 | 1557482                      | -        | -        | -          | -     | -             | -                            | 2874627 | -       | -          | -             | -     | -                            | -       | -  | -             | - | - |
| 1.0nM 10min | -                                                                                                                                                                                                                                                                    | -                                                   | -                                                                    | 442874                       | -             | -        | -          | -      | -  | 1557482                      | -        | -        | -          | -     | -             | -                            | 2874627 | -       | -          | -             | -     | -                            | -       | -  | -             | - | - |
| 1.0nM 15min | <i>ZIC1, E47</i><br><i>MAZ</i><br><i>E12, MYOD, E47</i><br><i>E12, AP4</i><br><i>MAZ, AP4</i><br><i>ETS2, E12</i><br><i>MAZ, SRF, T3R</i><br><i>YATTNATC, YCATTTAA</i><br><i>TATA, NFAT, YATTNATC, AACTTT</i><br><i>NFAT, YATTNATC, YCATTTAA</i><br><i>OCT, TATA</i> | 2<br>1<br>3<br>2<br>2<br>2<br>3<br>2<br>4<br>3<br>2 | 19<br>1474<br>136<br>362<br>388<br>232<br>11<br>55<br>26<br>26<br>91 | 359149                       | 0.00486       | 0.00107  | 0.141      | >1     | >1 | 1174108                      | -        | -        | -          | -     | -             | -                            | 2874627 | -       | -          | -             | -     | -                            | -       | -  | -             | - | - |
| 1.0nM 30min | <i>MAZ, E12</i>                                                                                                                                                                                                                                                      | 2                                                   | 478                                                                  | 442874                       | 0.00187       | 0.000333 | 0.0439     | >1     | >1 | 1557482                      | 0.000854 | 4.33E-05 | 0.00572    | 0.565 | >1            | 2874627                      | 0.704   | 0.0193  | >1         | >1            | >1    | -                            | -       | -  | -             | - |   |
